# Supplementary material for: Structural Variants at the BRCA1/2 Loci are a Common Source of Homologous Repair Deficiency in High-grade Serous Ovarian Carcinoma
Source: Oxford University Press journal article supplement (doi:10.1158/1078-0432.ccr-20-4068), 2021-03-19
Supplement: 10780432ccr204068-sup-253859_2_supp_6963237_qpgc49.xlsx [file 10780432ccr204068-sup-253859_2_supp_6963237_qpgc49.xlsx]

## Sheet: Sheet1
#Supplementary Table 7 - Structural variant counts at non-BRCA HR genes by type per sample.
Sample	Manta_DUP	Manta_DEL	Manta_INV	Manta_BND	Large_consensus_DUP	Large_consensus_DEL
AOCS_001	2	2	7	0	6	4
AOCS_005	2	2	2	0	3	0
AOCS_034	3	2	5	0	0	7
AOCS_055	4	2	3	0	1	0
AOCS_056	2	0	1	0	6	0
AOCS_057	1	1	4	0	4	5
AOCS_058	1	0	3	0	4	7
AOCS_060	0	0	7	0	4	0
AOCS_063	3	2	4	0	3	2
AOCS_064	0	1	7	0	1	0
AOCS_065	0	1	4	0	3	0
AOCS_075	2	1	4	0	1	0
AOCS_076	0	0	6	1	2	2
AOCS_077	0	2	0	0	1	0
AOCS_078	0	1	1	0	4	0
AOCS_079	2	0	6	0	4	0
AOCS_080	0	0	1	0	2	1
AOCS_081	0	2	0	0	5	0
AOCS_083	2	2	2	0	5	0
AOCS_084	0	1	0	0	5	1
AOCS_085	0	1	0	0	0	4
AOCS_086	0	0	3	0	4	0
AOCS_088	0	1	0	0	2	4
AOCS_090	2	2	0	0	6	1
AOCS_091	6	3	0	0	7	2
AOCS_092	0	0	4	0	7	0
AOCS_093	1	1	2	0	1	0
AOCS_094	1	1	4	0	0	1
AOCS_095	0	1	1	0	1	0
AOCS_096	4	1	12	0	5	0
AOCS_097	5	5	4	0	1	4
AOCS_104	2	0	0	0	0	2
AOCS_105	0	0	3	0	1	4
AOCS_106	0	0	4	0	5	1
AOCS_107	0	1	2	0	NA	NA
AOCS_108	0	3	2	0	1	0
AOCS_109	0	0	3	0	3	0
AOCS_111	2	1	0	0	6	1
AOCS_113	0	4	0	0	4	1
AOCS_114	2	0	0	0	1	6
AOCS_115	0	1	2	0	3	7
AOCS_116	0	0	13	0	3	1
AOCS_122	4	2	13	0	4	0
AOCS_125	1	1	0	0	6	0
AOCS_128	3	0	8	0	4	0
AOCS_130	2	1	1	2	4	0
AOCS_131	4	0	4	0	5	2
AOCS_132	0	3	1	0	5	1
AOCS_133	7	7	4	0	3	0
AOCS_139	3	0	2	0	1	0
AOCS_144	2	0	0	0	6	6
AOCS_145	9	0	1	0	5	1
AOCS_146	1	2	2	0	4	0
AOCS_147	3	4	11	0	0	8
AOCS_148	3	3	2	0	3	4
AOCS_149	2	4	6	0	9	0
AOCS_152	5	0	7	0	1	0
AOCS_153	0	1	3	0	1	3
AOCS_158	0	1	0	0	0	5
AOCS_159	3	1	2	0	2	1
AOCS_160	1	2	2	0	1	0
AOCS_161	1	1	1	0	0	1
AOCS_162	2	0	2	0	1	1
AOCS_164	2	0	3	0	3	4
AOCS_165	2	2	2	0	2	2
AOCS_168	1	2	4	0	3	0
AOCS_169	12	0	0	0	0	1
AOCS_170	4	2	1	0	1	0
AOCS_171	4	2	2	0	0	7
DO27978	1	0	0	0	4	3
DO28004	2	0	0	0	0	11
DO28024	2	1	3	0	0	1
DO28053	3	2	1	0	5	0
DO28089	5	0	9	0	6	6
DO28093	2	1	0	0	8	0
DO28119	0	2	3	0	2	0
DO28233	1	1	2	0	2	6
DO28273	5	0	0	0	2	5
DO28289	0	0	1	0	NA	NA
DO28412	3	0	0	1	NA	NA
DO28521	12	8	22	0	5	1
DO28763	1	0	5	0	2	2
DO28823	3	2	0	0	1	0
DO28873	2	0	2	0	1	0
DO28952	3	5	9	0	4	0
DO28962	1	0	4	0	6	0
DO29146	5	5	15	0	7	0
DO29308	3	1	0	0	5	0
DO29398	4	5	8	0	2	0
DO29760	2	4	7	0	2	1
DO29820	1	1	1	0	2	1
DO29850	6	3	4	0	8	0
DO29940	2	2	0	0	2	3
DO29970	2	1	8	0	6	3
DO29980	3	1	3	0	3	0
DO30060	0	1	3	0	8	0
DO30090	0	1	1	0	2	0
DO30220	0	2	3	0	6	0
DO30340	2	0	0	1	5	4
DO30550	0	1	0	0	1	0
DO30750	1	1	12	0	6	0
DO30970	0	1	7	0	2	0
DO31150	1	7	5	0	2	0
DO31420	1	0	0	0	2	0
DO31551	4	0	8	0	2	2
DO31729	2	0	5	0	6	1
DO31869	1	0	0	0	1	6
DO32237	0	0	8	0	1	4
DO32391	0	0	0	0	1	7
DO32420	2	3	2	0	2	4
DO32596	5	3	5	0	7	0
DO32646	0	1	1	0	6	1
SHGSOC001	1	0	1	0	0	5
SHGSOC003	4	4	2	1	0	1
SHGSOC004	2	0	0	0	3	0
SHGSOC007	0	3	0	0	3	4
SHGSOC008	2	2	2	0	4	1
SHGSOC009	3	4	5	0	4	1
SHGSOC010	0	0	3	0	NA	NA
SHGSOC011	3	0	0	0	5	0
SHGSOC012	10	8	24	0	NA	NA
SHGSOC013	1	1	1	1	4	1
SHGSOC014	1	1	1	1	3	0
SHGSOC015	3	6	24	0	5	0
SHGSOC016	0	0	7	0	8	2
SHGSOC017	5	8	11	0	5	0
SHGSOC019	12	7	6	0	5	0
SHGSOC020	3	1	1	0	6	0
SHGSOC021	1	0	1	0	1	0
SHGSOC022	0	1	11	0	6	0
SHGSOC024	6	6	2	0	1	3
SHGSOC025	0	1	2	2	3	0
SHGSOC026	1	3	14	0	5	0
SHGSOC031	0	0	2	0	0	6
SHGSOC032	0	2	6	0	NA	NA
SHGSOC033	0	0	4	0	6	0
SHGSOC034	0	0	7	0	3	2
SHGSOC037	5	5	7	0	3	1
SHGSOC038	0	0	3	0	5	1
SHGSOC039	3	3	2	0	6	0
SHGSOC041	2	0	2	0	1	6
SHGSOC042	0	2	8	0	2	0
SHGSOC043	0	0	3	0	NA	NA
SHGSOC044	2	3	3	0	2	0
SHGSOC045	2	2	2	1	1	0
SHGSOC046	2	2	0	0	6	2
SHGSOC047	0	0	4	0	3	0
SHGSOC048	2	4	10	0	6	2
SHGSOC050	1	0	3	0	2	1
SHGSOC051	6	6	6	0	2	0
SHGSOC053	0	0	1	0	0	0
SHGSOC054	0	1	2	0	3	1
SHGSOC055	0	0	2	0	3	1
SHGSOC056	1	0	3	2	4	0
SHGSOC057	0	0	0	1	2	0
SHGSOC058	1	3	0	0	2	0
SHGSOC059	0	1	3	0	1	0
SHGSOC061	4	0	0	0	2	0
SHGSOC062	0	1	1	0	2	0
SHGSOC066	0	0	8	0	12	0
SHGSOC067	1	0	2	0	3	3
SHGSOC071	1	0	4	0	1	1
SHGSOC072	1	0	1	1	NA	NA
SHGSOC074	5	15	23	0	3	2
SHGSOC076	1	1	3	0	8	0
SHGSOC077	3	3	2	0	5	0
SHGSOC078	0	6	3	0	4	1
SHGSOC080	0	1	1	0	4	2
SHGSOC081	0	0	5	0	5	0
SHGSOC082	3	5	6	0	1	0
SHGSOC085	8	8	6	0	4	0
SHGSOC086	2	3	0	0	7	0
SHGSOC088	1	1	6	0	2	5
SHGSOC089	3	0	1	0	3	1
SHGSOC090	0	1	0	0	1	6
SHGSOC091	2	3	4	0	3	0
SHGSOC093	0	0	3	0	2	0
SHGSOC094	8	3	11	0	3	0
SHGSOC095	2	2	3	0	3	0
SHGSOC096	0	2	0	0	4	0
SHGSOC097	4	1	3	0	5	0
SHGSOC098	3	1	0	0	3	3
SHGSOC099	0	2	1	0	3	1
SHGSOC100	2	0	14	1	3	2
SHGSOC101	0	0	2	0	NA	NA
SHGSOC102	1	0	4	0	2	7
SHGSOC103	1	1	4	0	6	2
AOCS_004	NA	NA	NA	NA	7	1
AOCS_059	NA	NA	NA	NA	2	1
AOCS_061	NA	NA	NA	NA	3	0
AOCS_112	NA	NA	NA	NA	3	0
AOCS_123	NA	NA	NA	NA	0	5
AOCS_124	NA	NA	NA	NA	1	0
AOCS_126	NA	NA	NA	NA	1	1
AOCS_143	NA	NA	NA	NA	2	0
AOCS_157	NA	NA	NA	NA	0	6
AOCS_163	NA	NA	NA	NA	0	1
AOCS_166	NA	NA	NA	NA	2	0
DO31769	NA	NA	NA	NA	1	5
SHGSOC002	NA	NA	NA	NA	6	3
SHGSOC023	NA	NA	NA	NA	0	1
SHGSOC030	NA	NA	NA	NA	0	1
SHGSOC040	NA	NA	NA	NA	1	0
SHGSOC065	NA	NA	NA	NA	3	0
SHGSOC084	NA	NA	NA	NA	0	5
