# Supplementary material for: Structural Variants at the BRCA1/2 Loci are a Common Source of Homologous Repair Deficiency in High-grade Serous Ovarian Carcinoma
Source: Oxford University Press journal article supplement (doi:10.1158/1078-0432.ccr-20-4068), 2021-03-19
Supplement: 10780432ccr204068-sup-253859_2_supp_6963238_qpgb49.xlsx [file 10780432ccr204068-sup-253859_2_supp_6963238_qpgb49.xlsx]

## Sheet: Germline SNVs
#Supplementary Table 6 - Germline SNVs and indels at non-BRCA HR genes. Variants filtered to include only those likely to be disruptive to the function of the gene.
Sample	HR_gene	Chr	Pos	Rsid	Ref	Alt	Qual	GT	AD	DP	Consequence	IMPACT	SYMBOL	Gene	Feature_type	Feature	BIOTYPE	INTRON	HGVSc	HGVSp	cDNA_position	CDS_position	Protein_position	Amino_acids	Codons	Existing_variation	ALLELE_NUM	DISTANCE	STRAND	FLAGS	VARIANT_CLASS	SYMBOL_SOURCE	HGNC_ID	CANONICAL	TSL	APPRIS	CCDS	ENSP	SWISSPROT	TREMBL	UNIPARC	REFSEQ_MATCH	SOURCE	GIVEN_REF	USED_REF	BAM_EDIT	GENE_PHENO	SIFT	PolyPhen
SHGSOC084	BLM	chr15	90784953	rs587779884	C	T	801.8	0/1	25,28	53	stop_gained	HIGH	BLM	ENSG00000197299	Transcript	ENST00000355112	protein_coding	ENST00000355112.7	c.2695C>T	ENSP00000347232.3:p.Arg899Ter	2813/5258	2695/4254	899/1417	R/*	Cga/Tga	rs587779884&CM973010&COSM3690618	1		1		SNV	HGNC	HGNC:1058	YES	1	P1	CCDS10363.1	ENSP00000347232	P54132		UPI00001269FA		Ensembl	C	C		1
AOCS_004	MUS81	chr11	65859230	rs1939212	C	T	598.8	0/1	22,21	43	splice_donor_variant	HIGH	CFL1	ENSG00000172757	Transcript	ENST00000525451	protein_coding	ENST00000525451.6	c.-532+1G>A							rs1939212	1		-1		SNV	HGNC	HGNC:1874	YES	2	P1	CCDS8114.1	ENSP00000432660	P23528	V9HWI5	UPI0000127E2C		Ensembl	C	C
AOCS_034	MUS81	chr11	65859230	rs1939212	C	T	1577.8	1/1	0,44	44	splice_donor_variant	HIGH	CFL1	ENSG00000172757	Transcript	ENST00000525451	protein_coding	ENST00000525451.6	c.-532+1G>A							rs1939212	1		-1		SNV	HGNC	HGNC:1874	YES	2	P1	CCDS8114.1	ENSP00000432660	P23528	V9HWI5	UPI0000127E2C		Ensembl	C	C
AOCS_055	MUS81	chr11	65859230	rs1939212	C	T	1891.8	1/1	0,53	53	splice_donor_variant	HIGH	CFL1	ENSG00000172757	Transcript	ENST00000525451	protein_coding	ENST00000525451.6	c.-532+1G>A							rs1939212	1		-1		SNV	HGNC	HGNC:1874	YES	2	P1	CCDS8114.1	ENSP00000432660	P23528	V9HWI5	UPI0000127E2C		Ensembl	C	C
AOCS_056	MUS81	chr11	65859230	rs1939212	C	T	727.8	0/1	16,24	40	splice_donor_variant	HIGH	CFL1	ENSG00000172757	Transcript	ENST00000525451	protein_coding	ENST00000525451.6	c.-532+1G>A							rs1939212	1		-1		SNV	HGNC	HGNC:1874	YES	2	P1	CCDS8114.1	ENSP00000432660	P23528	V9HWI5	UPI0000127E2C		Ensembl	C	C
AOCS_057	MUS81	chr11	65859230	rs1939212	C	T	1370.8	1/1	0,39	39	splice_donor_variant	HIGH	CFL1	ENSG00000172757	Transcript	ENST00000525451	protein_coding	ENST00000525451.6	c.-532+1G>A							rs1939212	1		-1		SNV	HGNC	HGNC:1874	YES	2	P1	CCDS8114.1	ENSP00000432660	P23528	V9HWI5	UPI0000127E2C		Ensembl	C	C
AOCS_058	MUS81	chr11	65859230	rs1939212	C	T	376.8	0/1	24,15	39	splice_donor_variant	HIGH	CFL1	ENSG00000172757	Transcript	ENST00000525451	protein_coding	ENST00000525451.6	c.-532+1G>A							rs1939212	1		-1		SNV	HGNC	HGNC:1874	YES	2	P1	CCDS8114.1	ENSP00000432660	P23528	V9HWI5	UPI0000127E2C		Ensembl	C	C
AOCS_060	MUS81	chr11	65859230	rs1939212	C	T	1404.8	1/1	0,39	39	splice_donor_variant	HIGH	CFL1	ENSG00000172757	Transcript	ENST00000525451	protein_coding	ENST00000525451.6	c.-532+1G>A							rs1939212	1		-1		SNV	HGNC	HGNC:1874	YES	2	P1	CCDS8114.1	ENSP00000432660	P23528	V9HWI5	UPI0000127E2C		Ensembl	C	C
AOCS_063	MUS81	chr11	65859230	rs1939212	C	T	505.8	0/1	29,19	48	splice_donor_variant	HIGH	CFL1	ENSG00000172757	Transcript	ENST00000525451	protein_coding	ENST00000525451.6	c.-532+1G>A							rs1939212	1		-1		SNV	HGNC	HGNC:1874	YES	2	P1	CCDS8114.1	ENSP00000432660	P23528	V9HWI5	UPI0000127E2C		Ensembl	C	C
AOCS_064	MUS81	chr11	65859230	rs1939212	C	T	443.8	0/1	5,15	20	splice_donor_variant	HIGH	CFL1	ENSG00000172757	Transcript	ENST00000525451	protein_coding	ENST00000525451.6	c.-532+1G>A							rs1939212	1		-1		SNV	HGNC	HGNC:1874	YES	2	P1	CCDS8114.1	ENSP00000432660	P23528	V9HWI5	UPI0000127E2C		Ensembl	C	C
AOCS_065	MUS81	chr11	65859230	rs1939212	C	T	517.8	0/1	15,18	33	splice_donor_variant	HIGH	CFL1	ENSG00000172757	Transcript	ENST00000525451	protein_coding	ENST00000525451.6	c.-532+1G>A							rs1939212	1		-1		SNV	HGNC	HGNC:1874	YES	2	P1	CCDS8114.1	ENSP00000432660	P23528	V9HWI5	UPI0000127E2C		Ensembl	C	C
AOCS_077	MUS81	chr11	65859230	rs1939212	C	T	808.8	0/1	26,28	54	splice_donor_variant	HIGH	CFL1	ENSG00000172757	Transcript	ENST00000525451	protein_coding	ENST00000525451.6	c.-532+1G>A							rs1939212	1		-1		SNV	HGNC	HGNC:1874	YES	2	P1	CCDS8114.1	ENSP00000432660	P23528	V9HWI5	UPI0000127E2C		Ensembl	C	C
AOCS_078	MUS81	chr11	65859230	rs1939212	C	T	516.8	0/1	18,19	37	splice_donor_variant	HIGH	CFL1	ENSG00000172757	Transcript	ENST00000525451	protein_coding	ENST00000525451.6	c.-532+1G>A							rs1939212	1		-1		SNV	HGNC	HGNC:1874	YES	2	P1	CCDS8114.1	ENSP00000432660	P23528	V9HWI5	UPI0000127E2C		Ensembl	C	C
AOCS_080	MUS81	chr11	65859230	rs1939212	C	T	425.8	0/1	13,16	29	splice_donor_variant	HIGH	CFL1	ENSG00000172757	Transcript	ENST00000525451	protein_coding	ENST00000525451.6	c.-532+1G>A							rs1939212	1		-1		SNV	HGNC	HGNC:1874	YES	2	P1	CCDS8114.1	ENSP00000432660	P23528	V9HWI5	UPI0000127E2C		Ensembl	C	C
AOCS_081	MUS81	chr11	65859230	rs1939212	C	T	816.8	0/1	27,30	57	splice_donor_variant	HIGH	CFL1	ENSG00000172757	Transcript	ENST00000525451	protein_coding	ENST00000525451.6	c.-532+1G>A							rs1939212	1		-1		SNV	HGNC	HGNC:1874	YES	2	P1	CCDS8114.1	ENSP00000432660	P23528	V9HWI5	UPI0000127E2C		Ensembl	C	C
AOCS_088	MUS81	chr11	65859230	rs1939212	C	T	613.8	0/1	15,21	36	splice_donor_variant	HIGH	CFL1	ENSG00000172757	Transcript	ENST00000525451	protein_coding	ENST00000525451.6	c.-532+1G>A							rs1939212	1		-1		SNV	HGNC	HGNC:1874	YES	2	P1	CCDS8114.1	ENSP00000432660	P23528	V9HWI5	UPI0000127E2C		Ensembl	C	C
AOCS_090	MUS81	chr11	65859230	rs1939212	C	T	2403.8	1/1	0,67	67	splice_donor_variant	HIGH	CFL1	ENSG00000172757	Transcript	ENST00000525451	protein_coding	ENST00000525451.6	c.-532+1G>A							rs1939212	1		-1		SNV	HGNC	HGNC:1874	YES	2	P1	CCDS8114.1	ENSP00000432660	P23528	V9HWI5	UPI0000127E2C		Ensembl	C	C
AOCS_091	MUS81	chr11	65859230	rs1939212	C	T	703.8	0/1	21,23	44	splice_donor_variant	HIGH	CFL1	ENSG00000172757	Transcript	ENST00000525451	protein_coding	ENST00000525451.6	c.-532+1G>A							rs1939212	1		-1		SNV	HGNC	HGNC:1874	YES	2	P1	CCDS8114.1	ENSP00000432660	P23528	V9HWI5	UPI0000127E2C		Ensembl	C	C
AOCS_092	MUS81	chr11	65859230	rs1939212	C	T	291.8	0/1	10,11	21	splice_donor_variant	HIGH	CFL1	ENSG00000172757	Transcript	ENST00000525451	protein_coding	ENST00000525451.6	c.-532+1G>A							rs1939212	1		-1		SNV	HGNC	HGNC:1874	YES	2	P1	CCDS8114.1	ENSP00000432660	P23528	V9HWI5	UPI0000127E2C		Ensembl	C	C
AOCS_094	MUS81	chr11	65859230	rs1939212	C	T	412.8	0/1	9,15	24	splice_donor_variant	HIGH	CFL1	ENSG00000172757	Transcript	ENST00000525451	protein_coding	ENST00000525451.6	c.-532+1G>A							rs1939212	1		-1		SNV	HGNC	HGNC:1874	YES	2	P1	CCDS8114.1	ENSP00000432660	P23528	V9HWI5	UPI0000127E2C		Ensembl	C	C
AOCS_096	MUS81	chr11	65859230	rs1939212	C	T	768.8	0/1	25,26	51	splice_donor_variant	HIGH	CFL1	ENSG00000172757	Transcript	ENST00000525451	protein_coding	ENST00000525451.6	c.-532+1G>A							rs1939212	1		-1		SNV	HGNC	HGNC:1874	YES	2	P1	CCDS8114.1	ENSP00000432660	P23528	V9HWI5	UPI0000127E2C		Ensembl	C	C
AOCS_104	MUS81	chr11	65859230	rs1939212	C	T	583.8	0/1	21,20	41	splice_donor_variant	HIGH	CFL1	ENSG00000172757	Transcript	ENST00000525451	protein_coding	ENST00000525451.6	c.-532+1G>A							rs1939212	1		-1		SNV	HGNC	HGNC:1874	YES	2	P1	CCDS8114.1	ENSP00000432660	P23528	V9HWI5	UPI0000127E2C		Ensembl	C	C
AOCS_106	MUS81	chr11	65859230	rs1939212	C	T	1185.8	1/1	0,33	33	splice_donor_variant	HIGH	CFL1	ENSG00000172757	Transcript	ENST00000525451	protein_coding	ENST00000525451.6	c.-532+1G>A							rs1939212	1		-1		SNV	HGNC	HGNC:1874	YES	2	P1	CCDS8114.1	ENSP00000432660	P23528	V9HWI5	UPI0000127E2C		Ensembl	C	C
AOCS_109	MUS81	chr11	65859230	rs1939212	C	T	530.8	0/1	19,18	37	splice_donor_variant	HIGH	CFL1	ENSG00000172757	Transcript	ENST00000525451	protein_coding	ENST00000525451.6	c.-532+1G>A							rs1939212	1		-1		SNV	HGNC	HGNC:1874	YES	2	P1	CCDS8114.1	ENSP00000432660	P23528	V9HWI5	UPI0000127E2C		Ensembl	C	C
AOCS_111	MUS81	chr11	65859230	rs1939212	C	T	430.8	0/1	14,16	30	splice_donor_variant	HIGH	CFL1	ENSG00000172757	Transcript	ENST00000525451	protein_coding	ENST00000525451.6	c.-532+1G>A							rs1939212	1		-1		SNV	HGNC	HGNC:1874	YES	2	P1	CCDS8114.1	ENSP00000432660	P23528	V9HWI5	UPI0000127E2C		Ensembl	C	C
AOCS_112	MUS81	chr11	65859230	rs1939212	C	T	482.8	0/1	16,17	33	splice_donor_variant	HIGH	CFL1	ENSG00000172757	Transcript	ENST00000525451	protein_coding	ENST00000525451.6	c.-532+1G>A							rs1939212	1		-1		SNV	HGNC	HGNC:1874	YES	2	P1	CCDS8114.1	ENSP00000432660	P23528	V9HWI5	UPI0000127E2C		Ensembl	C	C
AOCS_113	MUS81	chr11	65859230	rs1939212	C	T	470.8	0/1	13,16	29	splice_donor_variant	HIGH	CFL1	ENSG00000172757	Transcript	ENST00000525451	protein_coding	ENST00000525451.6	c.-532+1G>A							rs1939212	1		-1		SNV	HGNC	HGNC:1874	YES	2	P1	CCDS8114.1	ENSP00000432660	P23528	V9HWI5	UPI0000127E2C		Ensembl	C	C
AOCS_114	MUS81	chr11	65859230	rs1939212	C	T	706.8	0/1	17,24	41	splice_donor_variant	HIGH	CFL1	ENSG00000172757	Transcript	ENST00000525451	protein_coding	ENST00000525451.6	c.-532+1G>A							rs1939212	1		-1		SNV	HGNC	HGNC:1874	YES	2	P1	CCDS8114.1	ENSP00000432660	P23528	V9HWI5	UPI0000127E2C		Ensembl	C	C
AOCS_116	MUS81	chr11	65859230	rs1939212	C	T	375.8	0/1	20,14	34	splice_donor_variant	HIGH	CFL1	ENSG00000172757	Transcript	ENST00000525451	protein_coding	ENST00000525451.6	c.-532+1G>A							rs1939212	1		-1		SNV	HGNC	HGNC:1874	YES	2	P1	CCDS8114.1	ENSP00000432660	P23528	V9HWI5	UPI0000127E2C		Ensembl	C	C
AOCS_125	MUS81	chr11	65859230	rs1939212	C	T	377.8	0/1	12,14	26	splice_donor_variant	HIGH	CFL1	ENSG00000172757	Transcript	ENST00000525451	protein_coding	ENST00000525451.6	c.-532+1G>A							rs1939212	1		-1		SNV	HGNC	HGNC:1874	YES	2	P1	CCDS8114.1	ENSP00000432660	P23528	V9HWI5	UPI0000127E2C		Ensembl	C	C
AOCS_126	MUS81	chr11	65859230	rs1939212	C	T	387.8	0/1	16,14	30	splice_donor_variant	HIGH	CFL1	ENSG00000172757	Transcript	ENST00000525451	protein_coding	ENST00000525451.6	c.-532+1G>A							rs1939212	1		-1		SNV	HGNC	HGNC:1874	YES	2	P1	CCDS8114.1	ENSP00000432660	P23528	V9HWI5	UPI0000127E2C		Ensembl	C	C
AOCS_128	MUS81	chr11	65859230	rs1939212	C	T	531.8	0/1	29,20	49	splice_donor_variant	HIGH	CFL1	ENSG00000172757	Transcript	ENST00000525451	protein_coding	ENST00000525451.6	c.-532+1G>A							rs1939212	1		-1		SNV	HGNC	HGNC:1874	YES	2	P1	CCDS8114.1	ENSP00000432660	P23528	V9HWI5	UPI0000127E2C		Ensembl	C	C
AOCS_130	MUS81	chr11	65859230	rs1939212	C	T	489.8	0/1	21,19	40	splice_donor_variant	HIGH	CFL1	ENSG00000172757	Transcript	ENST00000525451	protein_coding	ENST00000525451.6	c.-532+1G>A							rs1939212	1		-1		SNV	HGNC	HGNC:1874	YES	2	P1	CCDS8114.1	ENSP00000432660	P23528	V9HWI5	UPI0000127E2C		Ensembl	C	C
AOCS_132	MUS81	chr11	65859230	rs1939212	C	T	608.8	0/1	19,22	41	splice_donor_variant	HIGH	CFL1	ENSG00000172757	Transcript	ENST00000525451	protein_coding	ENST00000525451.6	c.-532+1G>A							rs1939212	1		-1		SNV	HGNC	HGNC:1874	YES	2	P1	CCDS8114.1	ENSP00000432660	P23528	V9HWI5	UPI0000127E2C		Ensembl	C	C
AOCS_143	MUS81	chr11	65859230	rs1939212	C	T	424.8	0/1	13,15	28	splice_donor_variant	HIGH	CFL1	ENSG00000172757	Transcript	ENST00000525451	protein_coding	ENST00000525451.6	c.-532+1G>A							rs1939212	1		-1		SNV	HGNC	HGNC:1874	YES	2	P1	CCDS8114.1	ENSP00000432660	P23528	V9HWI5	UPI0000127E2C		Ensembl	C	C
AOCS_145	MUS81	chr11	65859230	rs1939212	C	T	605.8	0/1	28,23	51	splice_donor_variant	HIGH	CFL1	ENSG00000172757	Transcript	ENST00000525451	protein_coding	ENST00000525451.6	c.-532+1G>A							rs1939212	1		-1		SNV	HGNC	HGNC:1874	YES	2	P1	CCDS8114.1	ENSP00000432660	P23528	V9HWI5	UPI0000127E2C		Ensembl	C	C
AOCS_145	MUS81	chr11	65867070	.	T	TACCCAGATCCCACGGCTGCGCCACCAGCGCGACTTTCGCTTCCGCCGGGGTCGGCGCGCGGCGAATCAGCTCGATGATC	267.7	0/1	24,9	33	frameshift_variant	HIGH	EFEMP2	ENSG00000172638	Transcript	ENST00000307998	protein_coding	ENST00000307998.10	c.1179_1180insGATCATCGAGCTGATTCGCCGCGCGCCGACCCCGGCGGAAGCGAAAGTCGCGCTGGTGGCGCAGCCGTGGGATCTGGGT	ENSP00000309953.6:p.Asn394AspfsTer27	1410-1411/2034	1179-1180/1332	393-394/443	-/DHRADSPRADPGGSESRAGGAAVGSGX	-/GATCATCGAGCTGATTCGCCGCGCGCCGACCCCGGCGGAAGCGAAAGTCGCGCTGGTGGCGCAGCCGTGGGATCTGGGT		1		-1		insertion	HGNC	HGNC:3219	YES	1	P1	CCDS8116.1	ENSP00000309953	O95967	A0A024R5G1	UPI000013EC97		Ensembl				1
AOCS_146	MUS81	chr11	65859230	rs1939212	C	T	829.8	1/1	0,24	24	splice_donor_variant	HIGH	CFL1	ENSG00000172757	Transcript	ENST00000525451	protein_coding	ENST00000525451.6	c.-532+1G>A							rs1939212	1		-1		SNV	HGNC	HGNC:1874	YES	2	P1	CCDS8114.1	ENSP00000432660	P23528	V9HWI5	UPI0000127E2C		Ensembl	C	C
AOCS_153	MUS81	chr11	65859230	rs1939212	C	T	1071.8	0/1	44,38	82	splice_donor_variant	HIGH	CFL1	ENSG00000172757	Transcript	ENST00000525451	protein_coding	ENST00000525451.6	c.-532+1G>A							rs1939212	1		-1		SNV	HGNC	HGNC:1874	YES	2	P1	CCDS8114.1	ENSP00000432660	P23528	V9HWI5	UPI0000127E2C		Ensembl	C	C
AOCS_157	MUS81	chr11	65859230	rs1939212	C	T	496.8	0/1	17,18	35	splice_donor_variant	HIGH	CFL1	ENSG00000172757	Transcript	ENST00000525451	protein_coding	ENST00000525451.6	c.-532+1G>A							rs1939212	1		-1		SNV	HGNC	HGNC:1874	YES	2	P1	CCDS8114.1	ENSP00000432660	P23528	V9HWI5	UPI0000127E2C		Ensembl	C	C
AOCS_161	MUS81	chr11	65859230	rs1939212	C	T	506.8	0/1	14,18	32	splice_donor_variant	HIGH	CFL1	ENSG00000172757	Transcript	ENST00000525451	protein_coding	ENST00000525451.6	c.-532+1G>A							rs1939212	1		-1		SNV	HGNC	HGNC:1874	YES	2	P1	CCDS8114.1	ENSP00000432660	P23528	V9HWI5	UPI0000127E2C		Ensembl	C	C
AOCS_162	MUS81	chr11	65859230	rs1939212	C	T	766.8	1/1	0,23	23	splice_donor_variant	HIGH	CFL1	ENSG00000172757	Transcript	ENST00000525451	protein_coding	ENST00000525451.6	c.-532+1G>A							rs1939212	1		-1		SNV	HGNC	HGNC:1874	YES	2	P1	CCDS8114.1	ENSP00000432660	P23528	V9HWI5	UPI0000127E2C		Ensembl	C	C
AOCS_166	MUS81	chr11	65859230	rs1939212	C	T	1470.8	1/1	0,40	40	splice_donor_variant	HIGH	CFL1	ENSG00000172757	Transcript	ENST00000525451	protein_coding	ENST00000525451.6	c.-532+1G>A							rs1939212	1		-1		SNV	HGNC	HGNC:1874	YES	2	P1	CCDS8114.1	ENSP00000432660	P23528	V9HWI5	UPI0000127E2C		Ensembl	C	C
AOCS_169	MUS81	chr11	65859230	rs1939212	C	T	359.8	0/1	15,14	29	splice_donor_variant	HIGH	CFL1	ENSG00000172757	Transcript	ENST00000525451	protein_coding	ENST00000525451.6	c.-532+1G>A							rs1939212	1		-1		SNV	HGNC	HGNC:1874	YES	2	P1	CCDS8114.1	ENSP00000432660	P23528	V9HWI5	UPI0000127E2C		Ensembl	C	C
AOCS_170	MUS81	chr11	65859230	rs1939212	C	T	674.8	0/1	19,24	43	splice_donor_variant	HIGH	CFL1	ENSG00000172757	Transcript	ENST00000525451	protein_coding	ENST00000525451.6	c.-532+1G>A							rs1939212	1		-1		SNV	HGNC	HGNC:1874	YES	2	P1	CCDS8114.1	ENSP00000432660	P23528	V9HWI5	UPI0000127E2C		Ensembl	C	C
DO28004	MUS81	chr11	65859230	rs1939212	C	T	1274.8	1/1	0,36	36	splice_donor_variant	HIGH	CFL1	ENSG00000172757	Transcript	ENST00000525451	protein_coding	ENST00000525451.6	c.-532+1G>A							rs1939212	1		-1		SNV	HGNC	HGNC:1874	YES	2	P1	CCDS8114.1	ENSP00000432660	P23528	V9HWI5	UPI0000127E2C		Ensembl	C	C
DO28119	MUS81	chr11	65859230	rs1939212	C	T	434.8	0/1	12,15	27	splice_donor_variant	HIGH	CFL1	ENSG00000172757	Transcript	ENST00000525451	protein_coding	ENST00000525451.6	c.-532+1G>A							rs1939212	1		-1		SNV	HGNC	HGNC:1874	YES	2	P1	CCDS8114.1	ENSP00000432660	P23528	V9HWI5	UPI0000127E2C		Ensembl	C	C
DO28233	MUS81	chr11	65859230	rs1939212	C	T	954.8	1/1	0,27	27	splice_donor_variant	HIGH	CFL1	ENSG00000172757	Transcript	ENST00000525451	protein_coding	ENST00000525451.6	c.-532+1G>A							rs1939212	1		-1		SNV	HGNC	HGNC:1874	YES	2	P1	CCDS8114.1	ENSP00000432660	P23528	V9HWI5	UPI0000127E2C		Ensembl	C	C
DO28273	MUS81	chr11	65859230	rs1939212	C	T	248.8	0/1	13,11	24	splice_donor_variant	HIGH	CFL1	ENSG00000172757	Transcript	ENST00000525451	protein_coding	ENST00000525451.6	c.-532+1G>A							rs1939212	1		-1		SNV	HGNC	HGNC:1874	YES	2	P1	CCDS8114.1	ENSP00000432660	P23528	V9HWI5	UPI0000127E2C		Ensembl	C	C
DO28412	MUS81	chr11	65859230	rs1939212	C	T	556.8	0/1	15,20	35	splice_donor_variant	HIGH	CFL1	ENSG00000172757	Transcript	ENST00000525451	protein_coding	ENST00000525451.6	c.-532+1G>A							rs1939212	1		-1		SNV	HGNC	HGNC:1874	YES	2	P1	CCDS8114.1	ENSP00000432660	P23528	V9HWI5	UPI0000127E2C		Ensembl	C	C
DO28873	MUS81	chr11	65859230	rs1939212	C	T	714.8	0/1	14,24	38	splice_donor_variant	HIGH	CFL1	ENSG00000172757	Transcript	ENST00000525451	protein_coding	ENST00000525451.6	c.-532+1G>A							rs1939212	1		-1		SNV	HGNC	HGNC:1874	YES	2	P1	CCDS8114.1	ENSP00000432660	P23528	V9HWI5	UPI0000127E2C		Ensembl	C	C
DO28952	MUS81	chr11	65859230	rs1939212	C	T	498.8	0/1	25,22	47	splice_donor_variant	HIGH	CFL1	ENSG00000172757	Transcript	ENST00000525451	protein_coding	ENST00000525451.6	c.-532+1G>A							rs1939212	1		-1		SNV	HGNC	HGNC:1874	YES	2	P1	CCDS8114.1	ENSP00000432660	P23528	V9HWI5	UPI0000127E2C		Ensembl	C	C
DO29308	MUS81	chr11	65859230	rs1939212	C	T	346.8	0/1	9,12	21	splice_donor_variant	HIGH	CFL1	ENSG00000172757	Transcript	ENST00000525451	protein_coding	ENST00000525451.6	c.-532+1G>A							rs1939212	1		-1		SNV	HGNC	HGNC:1874	YES	2	P1	CCDS8114.1	ENSP00000432660	P23528	V9HWI5	UPI0000127E2C		Ensembl	C	C
DO29398	MUS81	chr11	65859230	rs1939212	C	T	173.8	0/1	13,7	20	splice_donor_variant	HIGH	CFL1	ENSG00000172757	Transcript	ENST00000525451	protein_coding	ENST00000525451.6	c.-532+1G>A							rs1939212	1		-1		SNV	HGNC	HGNC:1874	YES	2	P1	CCDS8114.1	ENSP00000432660	P23528	V9HWI5	UPI0000127E2C		Ensembl	C	C
DO29850	MUS81	chr11	65859230	rs1939212	C	T	715.8	0/1	22,24	46	splice_donor_variant	HIGH	CFL1	ENSG00000172757	Transcript	ENST00000525451	protein_coding	ENST00000525451.6	c.-532+1G>A							rs1939212	1		-1		SNV	HGNC	HGNC:1874	YES	2	P1	CCDS8114.1	ENSP00000432660	P23528	V9HWI5	UPI0000127E2C		Ensembl	C	C
DO29940	MUS81	chr11	65859230	rs1939212	C	T	373.8	0/1	4,12	16	splice_donor_variant	HIGH	CFL1	ENSG00000172757	Transcript	ENST00000525451	protein_coding	ENST00000525451.6	c.-532+1G>A							rs1939212	1		-1		SNV	HGNC	HGNC:1874	YES	2	P1	CCDS8114.1	ENSP00000432660	P23528	V9HWI5	UPI0000127E2C		Ensembl	C	C
DO29970	MUS81	chr11	65859230	rs1939212	C	T	147.8	0/1	12,7	19	splice_donor_variant	HIGH	CFL1	ENSG00000172757	Transcript	ENST00000525451	protein_coding	ENST00000525451.6	c.-532+1G>A							rs1939212	1		-1		SNV	HGNC	HGNC:1874	YES	2	P1	CCDS8114.1	ENSP00000432660	P23528	V9HWI5	UPI0000127E2C		Ensembl	C	C
DO30060	MUS81	chr11	65859230	rs1939212	C	T	401.8	0/1	12,14	26	splice_donor_variant	HIGH	CFL1	ENSG00000172757	Transcript	ENST00000525451	protein_coding	ENST00000525451.6	c.-532+1G>A							rs1939212	1		-1		SNV	HGNC	HGNC:1874	YES	2	P1	CCDS8114.1	ENSP00000432660	P23528	V9HWI5	UPI0000127E2C		Ensembl	C	C
DO30220	MUS81	chr11	65859230	rs1939212	C	T	803.8	0/1	25,28	53	splice_donor_variant	HIGH	CFL1	ENSG00000172757	Transcript	ENST00000525451	protein_coding	ENST00000525451.6	c.-532+1G>A							rs1939212	1		-1		SNV	HGNC	HGNC:1874	YES	2	P1	CCDS8114.1	ENSP00000432660	P23528	V9HWI5	UPI0000127E2C		Ensembl	C	C
DO30340	MUS81	chr11	65859230	rs1939212	C	T	400.8	0/1	14,14	28	splice_donor_variant	HIGH	CFL1	ENSG00000172757	Transcript	ENST00000525451	protein_coding	ENST00000525451.6	c.-532+1G>A							rs1939212	1		-1		SNV	HGNC	HGNC:1874	YES	2	P1	CCDS8114.1	ENSP00000432660	P23528	V9HWI5	UPI0000127E2C		Ensembl	C	C
DO30550	MUS81	chr11	65859230	rs1939212	C	T	211.8	0/1	9,8	17	splice_donor_variant	HIGH	CFL1	ENSG00000172757	Transcript	ENST00000525451	protein_coding	ENST00000525451.6	c.-532+1G>A							rs1939212	1		-1		SNV	HGNC	HGNC:1874	YES	2	P1	CCDS8114.1	ENSP00000432660	P23528	V9HWI5	UPI0000127E2C		Ensembl	C	C
DO30970	MUS81	chr11	65859230	rs1939212	C	T	348.8	0/1	12,12	24	splice_donor_variant	HIGH	CFL1	ENSG00000172757	Transcript	ENST00000525451	protein_coding	ENST00000525451.6	c.-532+1G>A							rs1939212	1		-1		SNV	HGNC	HGNC:1874	YES	2	P1	CCDS8114.1	ENSP00000432660	P23528	V9HWI5	UPI0000127E2C		Ensembl	C	C
DO31551	MUS81	chr11	65859230	rs1939212	C	T	1058.8	1/1	0,30	30	splice_donor_variant	HIGH	CFL1	ENSG00000172757	Transcript	ENST00000525451	protein_coding	ENST00000525451.6	c.-532+1G>A							rs1939212	1		-1		SNV	HGNC	HGNC:1874	YES	2	P1	CCDS8114.1	ENSP00000432660	P23528	V9HWI5	UPI0000127E2C		Ensembl	C	C
DO31729	MUS81	chr11	65859230	rs1939212	C	T	2308.8	1/1	0,65	65	splice_donor_variant	HIGH	CFL1	ENSG00000172757	Transcript	ENST00000525451	protein_coding	ENST00000525451.6	c.-532+1G>A							rs1939212	1		-1		SNV	HGNC	HGNC:1874	YES	2	P1	CCDS8114.1	ENSP00000432660	P23528	V9HWI5	UPI0000127E2C		Ensembl	C	C
DO31769	MUS81	chr11	65859230	rs1939212	C	T	339.8	0/1	12,13	25	splice_donor_variant	HIGH	CFL1	ENSG00000172757	Transcript	ENST00000525451	protein_coding	ENST00000525451.6	c.-532+1G>A							rs1939212	1		-1		SNV	HGNC	HGNC:1874	YES	2	P1	CCDS8114.1	ENSP00000432660	P23528	V9HWI5	UPI0000127E2C		Ensembl	C	C
DO31869	MUS81	chr11	65859230	rs1939212	C	T	652.8	0/1	27,24	51	splice_donor_variant	HIGH	CFL1	ENSG00000172757	Transcript	ENST00000525451	protein_coding	ENST00000525451.6	c.-532+1G>A							rs1939212	1		-1		SNV	HGNC	HGNC:1874	YES	2	P1	CCDS8114.1	ENSP00000432660	P23528	V9HWI5	UPI0000127E2C		Ensembl	C	C
DO32391	MUS81	chr11	65859230	rs1939212	C	T	371.8	0/1	15,13	28	splice_donor_variant	HIGH	CFL1	ENSG00000172757	Transcript	ENST00000525451	protein_coding	ENST00000525451.6	c.-532+1G>A							rs1939212	1		-1		SNV	HGNC	HGNC:1874	YES	2	P1	CCDS8114.1	ENSP00000432660	P23528	V9HWI5	UPI0000127E2C		Ensembl	C	C
DO32420	MUS81	chr11	65859230	rs1939212	C	T	836.8	1/1	0,23	23	splice_donor_variant	HIGH	CFL1	ENSG00000172757	Transcript	ENST00000525451	protein_coding	ENST00000525451.6	c.-532+1G>A							rs1939212	1		-1		SNV	HGNC	HGNC:1874	YES	2	P1	CCDS8114.1	ENSP00000432660	P23528	V9HWI5	UPI0000127E2C		Ensembl	C	C
DO32596	MUS81	chr11	65859230	rs1939212	C	T	694.8	0/1	22,25	47	splice_donor_variant	HIGH	CFL1	ENSG00000172757	Transcript	ENST00000525451	protein_coding	ENST00000525451.6	c.-532+1G>A							rs1939212	1		-1		SNV	HGNC	HGNC:1874	YES	2	P1	CCDS8114.1	ENSP00000432660	P23528	V9HWI5	UPI0000127E2C		Ensembl	C	C
SHGSOC002	MUS81	chr11	65859230	rs1939212	C	T	212.8	0/1	13,9	22	splice_donor_variant	HIGH	CFL1	ENSG00000172757	Transcript	ENST00000525451	protein_coding	ENST00000525451.6	c.-532+1G>A							rs1939212	1		-1		SNV	HGNC	HGNC:1874	YES	2	P1	CCDS8114.1	ENSP00000432660	P23528	V9HWI5	UPI0000127E2C		Ensembl	C	C
SHGSOC007	MUS81	chr11	65859230	rs1939212	C	T	303.8	0/1	15,13	28	splice_donor_variant	HIGH	CFL1	ENSG00000172757	Transcript	ENST00000525451	protein_coding	ENST00000525451.6	c.-532+1G>A							rs1939212	1		-1		SNV	HGNC	HGNC:1874	YES	2	P1	CCDS8114.1	ENSP00000432660	P23528	V9HWI5	UPI0000127E2C		Ensembl	C	C
SHGSOC008	MUS81	chr11	65859230	rs1939212	C	T	149.8	0/1	14,9	23	splice_donor_variant	HIGH	CFL1	ENSG00000172757	Transcript	ENST00000525451	protein_coding	ENST00000525451.6	c.-532+1G>A							rs1939212	1		-1		SNV	HGNC	HGNC:1874	YES	2	P1	CCDS8114.1	ENSP00000432660	P23528	V9HWI5	UPI0000127E2C		Ensembl	C	C
SHGSOC009	MUS81	chr11	65859230	rs1939212	C	T	205.8	0/1	7,12	19	splice_donor_variant	HIGH	CFL1	ENSG00000172757	Transcript	ENST00000525451	protein_coding	ENST00000525451.6	c.-532+1G>A							rs1939212	1		-1		SNV	HGNC	HGNC:1874	YES	2	P1	CCDS8114.1	ENSP00000432660	P23528	V9HWI5	UPI0000127E2C		Ensembl	C	C
SHGSOC012	MUS81	chr11	65859230	rs1939212	C	T	380.8	0/1	19,15	34	splice_donor_variant	HIGH	CFL1	ENSG00000172757	Transcript	ENST00000525451	protein_coding	ENST00000525451.6	c.-532+1G>A							rs1939212	1		-1		SNV	HGNC	HGNC:1874	YES	2	P1	CCDS8114.1	ENSP00000432660	P23528	V9HWI5	UPI0000127E2C		Ensembl	C	C
SHGSOC013	MUS81	chr11	65859230	rs1939212	C	T	209.8	0/1	14,10	24	splice_donor_variant	HIGH	CFL1	ENSG00000172757	Transcript	ENST00000525451	protein_coding	ENST00000525451.6	c.-532+1G>A							rs1939212	1		-1		SNV	HGNC	HGNC:1874	YES	2	P1	CCDS8114.1	ENSP00000432660	P23528	V9HWI5	UPI0000127E2C		Ensembl	C	C
SHGSOC016	MUS81	chr11	65859230	rs1939212	C	T	369.8	0/1	11,17	28	splice_donor_variant	HIGH	CFL1	ENSG00000172757	Transcript	ENST00000525451	protein_coding	ENST00000525451.6	c.-532+1G>A							rs1939212	1		-1		SNV	HGNC	HGNC:1874	YES	2	P1	CCDS8114.1	ENSP00000432660	P23528	V9HWI5	UPI0000127E2C		Ensembl	C	C
SHGSOC017	MUS81	chr11	65859230	rs1939212	C	T	311.8	0/1	21,12	33	splice_donor_variant	HIGH	CFL1	ENSG00000172757	Transcript	ENST00000525451	protein_coding	ENST00000525451.6	c.-532+1G>A							rs1939212	1		-1		SNV	HGNC	HGNC:1874	YES	2	P1	CCDS8114.1	ENSP00000432660	P23528	V9HWI5	UPI0000127E2C		Ensembl	C	C
SHGSOC020	MUS81	chr11	65859230	rs1939212	C	T	381.8	0/1	15,17	32	splice_donor_variant	HIGH	CFL1	ENSG00000172757	Transcript	ENST00000525451	protein_coding	ENST00000525451.6	c.-532+1G>A							rs1939212	1		-1		SNV	HGNC	HGNC:1874	YES	2	P1	CCDS8114.1	ENSP00000432660	P23528	V9HWI5	UPI0000127E2C		Ensembl	C	C
SHGSOC021	MUS81	chr11	65859230	rs1939212	C	T	548.8	0/1	12,20	32	splice_donor_variant	HIGH	CFL1	ENSG00000172757	Transcript	ENST00000525451	protein_coding	ENST00000525451.6	c.-532+1G>A							rs1939212	1		-1		SNV	HGNC	HGNC:1874	YES	2	P1	CCDS8114.1	ENSP00000432660	P23528	V9HWI5	UPI0000127E2C		Ensembl	C	C
SHGSOC025	MUS81	chr11	65859230	rs1939212	C	T	797.8	0/1	18,31	49	splice_donor_variant	HIGH	CFL1	ENSG00000172757	Transcript	ENST00000525451	protein_coding	ENST00000525451.6	c.-532+1G>A							rs1939212	1		-1		SNV	HGNC	HGNC:1874	YES	2	P1	CCDS8114.1	ENSP00000432660	P23528	V9HWI5	UPI0000127E2C		Ensembl	C	C
SHGSOC032	MUS81	chr11	65859230	rs1939212	C	T	883.8	0/1	17,34	51	splice_donor_variant	HIGH	CFL1	ENSG00000172757	Transcript	ENST00000525451	protein_coding	ENST00000525451.6	c.-532+1G>A							rs1939212	1		-1		SNV	HGNC	HGNC:1874	YES	2	P1	CCDS8114.1	ENSP00000432660	P23528	V9HWI5	UPI0000127E2C		Ensembl	C	C
SHGSOC034	MUS81	chr11	65859230	rs1939212	C	T	469.8	0/1	22,17	39	splice_donor_variant	HIGH	CFL1	ENSG00000172757	Transcript	ENST00000525451	protein_coding	ENST00000525451.6	c.-532+1G>A							rs1939212	1		-1		SNV	HGNC	HGNC:1874	YES	2	P1	CCDS8114.1	ENSP00000432660	P23528	V9HWI5	UPI0000127E2C		Ensembl	C	C
SHGSOC037	MUS81	chr11	65859230	rs1939212	C	T	449.8	0/1	20,17	37	splice_donor_variant	HIGH	CFL1	ENSG00000172757	Transcript	ENST00000525451	protein_coding	ENST00000525451.6	c.-532+1G>A							rs1939212	1		-1		SNV	HGNC	HGNC:1874	YES	2	P1	CCDS8114.1	ENSP00000432660	P23528	V9HWI5	UPI0000127E2C		Ensembl	C	C
SHGSOC038	MUS81	chr11	65859230	rs1939212	C	T	614.8	0/1	17,22	39	splice_donor_variant	HIGH	CFL1	ENSG00000172757	Transcript	ENST00000525451	protein_coding	ENST00000525451.6	c.-532+1G>A							rs1939212	1		-1		SNV	HGNC	HGNC:1874	YES	2	P1	CCDS8114.1	ENSP00000432660	P23528	V9HWI5	UPI0000127E2C		Ensembl	C	C
SHGSOC039	MUS81	chr11	65859230	rs1939212	C	T	795.8	0/1	30,30	60	splice_donor_variant	HIGH	CFL1	ENSG00000172757	Transcript	ENST00000525451	protein_coding	ENST00000525451.6	c.-532+1G>A							rs1939212	1		-1		SNV	HGNC	HGNC:1874	YES	2	P1	CCDS8114.1	ENSP00000432660	P23528	V9HWI5	UPI0000127E2C		Ensembl	C	C
SHGSOC040	MUS81	chr11	65859230	rs1939212	C	T	1816.8	1/1	1,58	59	splice_donor_variant	HIGH	CFL1	ENSG00000172757	Transcript	ENST00000525451	protein_coding	ENST00000525451.6	c.-532+1G>A							rs1939212	1		-1		SNV	HGNC	HGNC:1874	YES	2	P1	CCDS8114.1	ENSP00000432660	P23528	V9HWI5	UPI0000127E2C		Ensembl	C	C
SHGSOC044	MUS81	chr11	65859230	rs1939212	C	T	424.8	0/1	20,16	36	splice_donor_variant	HIGH	CFL1	ENSG00000172757	Transcript	ENST00000525451	protein_coding	ENST00000525451.6	c.-532+1G>A							rs1939212	1		-1		SNV	HGNC	HGNC:1874	YES	2	P1	CCDS8114.1	ENSP00000432660	P23528	V9HWI5	UPI0000127E2C		Ensembl	C	C
SHGSOC046	MUS81	chr11	65859230	rs1939212	C	T	551.8	0/1	10,20	30	splice_donor_variant	HIGH	CFL1	ENSG00000172757	Transcript	ENST00000525451	protein_coding	ENST00000525451.6	c.-532+1G>A							rs1939212	1		-1		SNV	HGNC	HGNC:1874	YES	2	P1	CCDS8114.1	ENSP00000432660	P23528	V9HWI5	UPI0000127E2C		Ensembl	C	C
SHGSOC047	MUS81	chr11	65859230	rs1939212	C	T	343.8	0/1	18,14	32	splice_donor_variant	HIGH	CFL1	ENSG00000172757	Transcript	ENST00000525451	protein_coding	ENST00000525451.6	c.-532+1G>A							rs1939212	1		-1		SNV	HGNC	HGNC:1874	YES	2	P1	CCDS8114.1	ENSP00000432660	P23528	V9HWI5	UPI0000127E2C		Ensembl	C	C
SHGSOC048	MUS81	chr11	65859230	rs1939212	C	T	1345.8	1/1	0,42	42	splice_donor_variant	HIGH	CFL1	ENSG00000172757	Transcript	ENST00000525451	protein_coding	ENST00000525451.6	c.-532+1G>A							rs1939212	1		-1		SNV	HGNC	HGNC:1874	YES	2	P1	CCDS8114.1	ENSP00000432660	P23528	V9HWI5	UPI0000127E2C		Ensembl	C	C
SHGSOC050	MUS81	chr11	65859230	rs1939212	C	T	445.8	0/1	14,21	35	splice_donor_variant	HIGH	CFL1	ENSG00000172757	Transcript	ENST00000525451	protein_coding	ENST00000525451.6	c.-532+1G>A							rs1939212	1		-1		SNV	HGNC	HGNC:1874	YES	2	P1	CCDS8114.1	ENSP00000432660	P23528	V9HWI5	UPI0000127E2C		Ensembl	C	C
SHGSOC053	MUS81	chr11	65859230	rs1939212	C	T	190.8	0/1	16,11	27	splice_donor_variant	HIGH	CFL1	ENSG00000172757	Transcript	ENST00000525451	protein_coding	ENST00000525451.6	c.-532+1G>A							rs1939212	1		-1		SNV	HGNC	HGNC:1874	YES	2	P1	CCDS8114.1	ENSP00000432660	P23528	V9HWI5	UPI0000127E2C		Ensembl	C	C
SHGSOC057	MUS81	chr11	65859230	rs1939212	C	T	253.8	0/1	12,10	22	splice_donor_variant	HIGH	CFL1	ENSG00000172757	Transcript	ENST00000525451	protein_coding	ENST00000525451.6	c.-532+1G>A							rs1939212	1		-1		SNV	HGNC	HGNC:1874	YES	2	P1	CCDS8114.1	ENSP00000432660	P23528	V9HWI5	UPI0000127E2C		Ensembl	C	C
SHGSOC058	MUS81	chr11	65859230	rs1939212	C	T	413.8	0/1	22,16	38	splice_donor_variant	HIGH	CFL1	ENSG00000172757	Transcript	ENST00000525451	protein_coding	ENST00000525451.6	c.-532+1G>A							rs1939212	1		-1		SNV	HGNC	HGNC:1874	YES	2	P1	CCDS8114.1	ENSP00000432660	P23528	V9HWI5	UPI0000127E2C		Ensembl	C	C
SHGSOC059	MUS81	chr11	65859230	rs1939212	C	T	845.8	0/1	18,30	48	splice_donor_variant	HIGH	CFL1	ENSG00000172757	Transcript	ENST00000525451	protein_coding	ENST00000525451.6	c.-532+1G>A							rs1939212	1		-1		SNV	HGNC	HGNC:1874	YES	2	P1	CCDS8114.1	ENSP00000432660	P23528	V9HWI5	UPI0000127E2C		Ensembl	C	C
SHGSOC062	MUS81	chr11	65859230	rs1939212	C	T	245.8	0/1	24,12	36	splice_donor_variant	HIGH	CFL1	ENSG00000172757	Transcript	ENST00000525451	protein_coding	ENST00000525451.6	c.-532+1G>A							rs1939212	1		-1		SNV	HGNC	HGNC:1874	YES	2	P1	CCDS8114.1	ENSP00000432660	P23528	V9HWI5	UPI0000127E2C		Ensembl	C	C
SHGSOC065	MUS81	chr11	65859230	rs1939212	C	T	959.8	1/1	0,36	36	splice_donor_variant	HIGH	CFL1	ENSG00000172757	Transcript	ENST00000525451	protein_coding	ENST00000525451.6	c.-532+1G>A							rs1939212	1		-1		SNV	HGNC	HGNC:1874	YES	2	P1	CCDS8114.1	ENSP00000432660	P23528	V9HWI5	UPI0000127E2C		Ensembl	C	C
SHGSOC066	MUS81	chr11	65859230	rs1939212	C	T	239.8	0/1	17,10	27	splice_donor_variant	HIGH	CFL1	ENSG00000172757	Transcript	ENST00000525451	protein_coding	ENST00000525451.6	c.-532+1G>A							rs1939212	1		-1		SNV	HGNC	HGNC:1874	YES	2	P1	CCDS8114.1	ENSP00000432660	P23528	V9HWI5	UPI0000127E2C		Ensembl	C	C
SHGSOC067	MUS81	chr11	65859230	rs1939212	C	T	400.8	0/1	18,16	34	splice_donor_variant	HIGH	CFL1	ENSG00000172757	Transcript	ENST00000525451	protein_coding	ENST00000525451.6	c.-532+1G>A							rs1939212	1		-1		SNV	HGNC	HGNC:1874	YES	2	P1	CCDS8114.1	ENSP00000432660	P23528	V9HWI5	UPI0000127E2C		Ensembl	C	C
SHGSOC071	MUS81	chr11	65859230	rs1939212	C	T	441.8	0/1	14,16	30	splice_donor_variant	HIGH	CFL1	ENSG00000172757	Transcript	ENST00000525451	protein_coding	ENST00000525451.6	c.-532+1G>A							rs1939212	1		-1		SNV	HGNC	HGNC:1874	YES	2	P1	CCDS8114.1	ENSP00000432660	P23528	V9HWI5	UPI0000127E2C		Ensembl	C	C
SHGSOC074	MUS81	chr11	65859230	rs1939212	C	T	379.8	0/1	20,14	34	splice_donor_variant	HIGH	CFL1	ENSG00000172757	Transcript	ENST00000525451	protein_coding	ENST00000525451.6	c.-532+1G>A							rs1939212	1		-1		SNV	HGNC	HGNC:1874	YES	2	P1	CCDS8114.1	ENSP00000432660	P23528	V9HWI5	UPI0000127E2C		Ensembl	C	C
SHGSOC076	MUS81	chr11	65859230	rs1939212	C	T	1404.8	1/1	0,41	41	splice_donor_variant	HIGH	CFL1	ENSG00000172757	Transcript	ENST00000525451	protein_coding	ENST00000525451.6	c.-532+1G>A							rs1939212	1		-1		SNV	HGNC	HGNC:1874	YES	2	P1	CCDS8114.1	ENSP00000432660	P23528	V9HWI5	UPI0000127E2C		Ensembl	C	C
SHGSOC077	MUS81	chr11	65859230	rs1939212	C	T	369.8	0/1	14,13	27	splice_donor_variant	HIGH	CFL1	ENSG00000172757	Transcript	ENST00000525451	protein_coding	ENST00000525451.6	c.-532+1G>A							rs1939212	1		-1		SNV	HGNC	HGNC:1874	YES	2	P1	CCDS8114.1	ENSP00000432660	P23528	V9HWI5	UPI0000127E2C		Ensembl	C	C
SHGSOC084	MUS81	chr11	65859230	rs1939212	C	T	1145.8	0/1	29,40	69	splice_donor_variant	HIGH	CFL1	ENSG00000172757	Transcript	ENST00000525451	protein_coding	ENST00000525451.6	c.-532+1G>A							rs1939212	1		-1		SNV	HGNC	HGNC:1874	YES	2	P1	CCDS8114.1	ENSP00000432660	P23528	V9HWI5	UPI0000127E2C		Ensembl	C	C
SHGSOC088	MUS81	chr11	65859230	rs1939212	C	T	343.8	0/1	10,13	23	splice_donor_variant	HIGH	CFL1	ENSG00000172757	Transcript	ENST00000525451	protein_coding	ENST00000525451.6	c.-532+1G>A							rs1939212	1		-1		SNV	HGNC	HGNC:1874	YES	2	P1	CCDS8114.1	ENSP00000432660	P23528	V9HWI5	UPI0000127E2C		Ensembl	C	C
SHGSOC094	MUS81	chr11	65859230	rs1939212	C	T	899.8	0/1	15,32	47	splice_donor_variant	HIGH	CFL1	ENSG00000172757	Transcript	ENST00000525451	protein_coding	ENST00000525451.6	c.-532+1G>A							rs1939212	1		-1		SNV	HGNC	HGNC:1874	YES	2	P1	CCDS8114.1	ENSP00000432660	P23528	V9HWI5	UPI0000127E2C		Ensembl	C	C
SHGSOC096	MUS81	chr11	65859230	rs1939212	C	T	1259.8	1/1	0,39	39	splice_donor_variant	HIGH	CFL1	ENSG00000172757	Transcript	ENST00000525451	protein_coding	ENST00000525451.6	c.-532+1G>A							rs1939212	1		-1		SNV	HGNC	HGNC:1874	YES	2	P1	CCDS8114.1	ENSP00000432660	P23528	V9HWI5	UPI0000127E2C		Ensembl	C	C
SHGSOC098	MUS81	chr11	65859230	rs1939212	C	T	238.8	0/1	12,11	23	splice_donor_variant	HIGH	CFL1	ENSG00000172757	Transcript	ENST00000525451	protein_coding	ENST00000525451.6	c.-532+1G>A							rs1939212	1		-1		SNV	HGNC	HGNC:1874	YES	2	P1	CCDS8114.1	ENSP00000432660	P23528	V9HWI5	UPI0000127E2C		Ensembl	C	C
AOCS_164	POLD1	chr19	50409529	rs61751955	G	A	563.8	0/1	20,19	39	missense_variant	MODERATE	POLD1	ENSG00000062822	Transcript	ENST00000613923	protein_coding	ENST00000613923.4	c.2095G>A	ENSP00000481858.1:p.Glu699Lys	2164/3542	2095/3402	699/1133	E/K	Gag/Aag	rs61751955	1		1		SNV	HGNC	HGNC:9175	YES	5		CCDS82381.1	ENSP00000481858		M0R2B7	UPI00015DF997		Ensembl	G	G		1	deleterious(0)	possibly_damaging(0.557)
DO28089	POLD1	chr19	50407176	rs763095967	T	G	254.8	0/1	38,12	50	splice_donor_variant	HIGH	POLD1	ENSG00000062822	Transcript	ENST00000613923	protein_coding	ENST00000613923.4	c.1686+2T>G							rs763095967	1		1		SNV	HGNC	HGNC:9175	YES	5		CCDS82381.1	ENSP00000481858		M0R2B7	UPI00015DF997		Ensembl	T	T		1
DO28089	POLD1	chr19	50407055	.	C	G	221.8	0/1	83,24	107	missense_variant	MODERATE	POLD1	ENSG00000062822	Transcript	ENST00000613923	protein_coding	ENST00000613923.4	c.1567C>G	ENSP00000481858.1:p.Leu523Val	1636/3542	1567/3402	523/1133	L/V	Ctg/Gtg		1		1		SNV	HGNC	HGNC:9175	YES	5		CCDS82381.1	ENSP00000481858		M0R2B7	UPI00015DF997		Ensembl	C	C		1	deleterious(0.02)	benign(0.285)
DO29820	POLD1	chr19	50401819	rs746234949	G	C	118.8	0/1	5,6	11	missense_variant	MODERATE	POLD1	ENSG00000062822	Transcript	ENST00000613923	protein_coding	ENST00000613923.4	c.358G>C	ENSP00000481858.1:p.Gly120Arg	427/3542	358/3402	120/1133	G/R	Ggc/Cgc	rs746234949	1		1		SNV	HGNC	HGNC:9175	YES	5		CCDS82381.1	ENSP00000481858		M0R2B7	UPI00015DF997		Ensembl	G	G		1	deleterious(0.02)	possibly_damaging(0.593)
DO30060	POLD1	chr19	50399413	rs201006221	C	T	249.8	0/1	12,9	21	missense_variant	MODERATE	POLD1	ENSG00000062822	Transcript	ENST00000613923	protein_coding	ENST00000613923.4	c.245C>T	ENSP00000481858.1:p.Pro82Leu	314/3542	245/3402	82/1133	P/L	cCc/cTc	rs201006221	1		1		SNV	HGNC	HGNC:9175	YES	5		CCDS82381.1	ENSP00000481858		M0R2B7	UPI00015DF997		Ensembl	C	C		1	deleterious(0.01)	possibly_damaging(0.898)
SHGSOC082	POLD1	chr19	50403533	rs750322846	T	C	1104.8	0/1	35,38	73	missense_variant	MODERATE	POLD1	ENSG00000062822	Transcript	ENST00000613923	protein_coding	ENST00000613923.4	c.1178T>C	ENSP00000481858.1:p.Ile393Thr	1247/3542	1178/3402	393/1133	I/T	aTc/aCc	rs750322846	1		1		SNV	HGNC	HGNC:9175	YES	5		CCDS82381.1	ENSP00000481858		M0R2B7	UPI00015DF997		Ensembl	T	T		1	deleterious(0)	probably_damaging(0.944)
SHGSOC090	POLD1	chr19	50409564	rs144143245	G	C	472.8	0/1	25,23	48	missense_variant	MODERATE	POLD1	ENSG00000062822	Transcript	ENST00000613923	protein_coding	ENST00000613923.4	c.2130G>C	ENSP00000481858.1:p.Gln710His	2199/3542	2130/3402	710/1133	Q/H	caG/caC	rs144143245&COSM5988666&COSM5988665	1		1		SNV	HGNC	HGNC:9175	YES	5		CCDS82381.1	ENSP00000481858		M0R2B7	UPI00015DF997		Ensembl	G	G		1	deleterious(0.02)	possibly_damaging(0.796)
AOCS_158	POLD3	chr11	74629273	rs201575276	A	G	648.8	0/1	24,22	46	missense_variant	MODERATE	POLD3	ENSG00000077514	Transcript	ENST00000263681	protein_coding	ENST00000263681.6	c.956A>G	ENSP00000263681.2:p.Lys319Arg	1085/3821	956/1401	319/466	K/R	aAa/aGa	rs201575276	1		1		SNV	HGNC	HGNC:20932	YES	1	P1	CCDS8233.1	ENSP00000263681	Q15054	A0A024R5M8	UPI000012973E		Ensembl	A	A			tolerated(0.23)	probably_damaging(0.998)
AOCS_125	RAD50	chr5	132595759	rs397507178	T	TA	332.7	0/1	21,17	38	frameshift_variant	HIGH	RAD50	ENSG00000113522	Transcript	ENST00000378823	protein_coding	ENST00000378823.7	c.2165dup	ENSP00000368100.4:p.Glu723GlyfsTer5	2543-2544/8306	2156-2157/3939	719/1312	L/LX	cta/ctAa	rs397507178	1		1		insertion	HGNC	HGNC:9816	YES	1	P1	CCDS34233.1	ENSP00000368100	Q92878		UPI000006E9ED		Ensembl				1
AOCS_143	RAD50	chr5	132604829	rs181961360	C	T	579.8	0/1	15,19	34	missense_variant	MODERATE	RAD50	ENSG00000113522	Transcript	ENST00000378823	protein_coding	ENST00000378823.7	c.2548C>T	ENSP00000368100.4:p.Arg850Cys	2935/8306	2548/3939	850/1312	R/C	Cgt/Tgt	rs181961360&COSM6370675&COSM6370674	1		1		SNV	HGNC	HGNC:9816	YES	1	P1	CCDS34233.1	ENSP00000368100	Q92878		UPI000006E9ED		Ensembl	C	C		1	deleterious(0)	possibly_damaging(0.724)
AOCS_168	RAD50	chr5	132618237	.	T	C	436.8	0/1	17,19	36	missense_variant	MODERATE	RAD50	ENSG00000113522	Transcript	ENST00000378823	protein_coding	ENST00000378823.7	c.3332T>C	ENSP00000368100.4:p.Met1111Thr	3719/8306	3332/3939	1111/1312	M/T	aTg/aCg		1		1		SNV	HGNC	HGNC:9816	YES	1	P1	CCDS34233.1	ENSP00000368100	Q92878		UPI000006E9ED		Ensembl	T	T		1	deleterious(0.01)	benign(0.157)
SHGSOC020	RAD50	chr5	132618255	.	T	A	556.8	0/1	20,21	41	missense_variant	MODERATE	RAD50	ENSG00000113522	Transcript	ENST00000378823	protein_coding	ENST00000378823.7	c.3350T>A	ENSP00000368100.4:p.Val1117Glu	3737/8306	3350/3939	1117/1312	V/E	gTg/gAg		1		1		SNV	HGNC	HGNC:9816	YES	1	P1	CCDS34233.1	ENSP00000368100	Q92878		UPI000006E9ED		Ensembl	T	T		1	deleterious(0.03)	benign(0.241)
SHGSOC076	RAD50	chr5	132589662	rs145428112	A	G	504.8	0/1	24,23	47	missense_variant	MODERATE	RAD50	ENSG00000113522	Transcript	ENST00000378823	protein_coding	ENST00000378823.7	c.1277A>G	ENSP00000368100.4:p.Gln426Arg	1664/8306	1277/3939	426/1312	Q/R	cAa/cGa	rs145428112	1		1		SNV	HGNC	HGNC:9816	YES	1	P1	CCDS34233.1	ENSP00000368100	Q92878		UPI000006E9ED		Ensembl	A	A		1	deleterious(0.02)	possibly_damaging(0.9)
SHGSOC065	RAD51	chr15	40729531	rs142701178	C	G	499.8	0/1	11,17	28	missense_variant	MODERATE	RAD51	ENSG00000051180	Transcript	ENST00000382643	protein_coding	ENST00000382643.7	c.674C>G	ENSP00000372088.3:p.Ala225Gly	824/1588	674/1023	225/340	A/G	gCc/gGc	rs142701178	1		1		SNV	HGNC	HGNC:9817	YES	2		CCDS53931.1	ENSP00000372088	Q06609		UPI000035E763		Ensembl	C	C		1	deleterious(0)	possibly_damaging(0.71)
SHGSOC007	RAD51C	chr17	58709871	rs863224806	A	T	302.8	0/1	20,14	34	missense_variant	MODERATE	RAD51C	ENSG00000108384	Transcript	ENST00000337432	protein_coding	ENST00000337432.8	c.718A>T	ENSP00000336701.4:p.Ile240Leu	789/2591	718/1131	240/376	I/L	Ata/Tta	rs863224806	1		1		SNV	HGNC	HGNC:9820	YES	1	P2	CCDS11611.1	ENSP00000336701	O43502		UPI0000133007		Ensembl	A	A		1	deleterious(0.03)	benign(0.395)
AOCS_065	RAD52	chr12	914052	rs4987207	G	T	386.8	0/1	16,14	30	stop_gained	HIGH	RAD52	ENSG00000002016	Transcript	ENST00000358495	protein_coding	ENST00000358495.7	c.1037C>A	ENSP00000351284.3:p.Ser346Ter	1176/2710	1037/1257	346/418	S/*	tCg/tAg	rs4987207&CM025484	1		-1		SNV	HGNC	HGNC:9824	YES	1	P3	CCDS8507.2	ENSP00000351284	P43351	Q5DR82	UPI0000133035		Ensembl	G	G
AOCS_079	RAD52	chr12	914052	rs4987207	G	T	580.8	0/1	17,21	38	stop_gained	HIGH	RAD52	ENSG00000002016	Transcript	ENST00000358495	protein_coding	ENST00000358495.7	c.1037C>A	ENSP00000351284.3:p.Ser346Ter	1176/2710	1037/1257	346/418	S/*	tCg/tAg	rs4987207&CM025484	1		-1		SNV	HGNC	HGNC:9824	YES	1	P3	CCDS8507.2	ENSP00000351284	P43351	Q5DR82	UPI0000133035		Ensembl	G	G
AOCS_108	RAD52	chr12	914052	rs4987207	G	T	522.8	0/1	21,18	39	stop_gained	HIGH	RAD52	ENSG00000002016	Transcript	ENST00000358495	protein_coding	ENST00000358495.7	c.1037C>A	ENSP00000351284.3:p.Ser346Ter	1176/2710	1037/1257	346/418	S/*	tCg/tAg	rs4987207&CM025484	1		-1		SNV	HGNC	HGNC:9824	YES	1	P3	CCDS8507.2	ENSP00000351284	P43351	Q5DR82	UPI0000133035		Ensembl	G	G
AOCS_168	RAD52	chr12	914052	rs4987207	G	T	227.8	0/1	17,9	26	stop_gained	HIGH	RAD52	ENSG00000002016	Transcript	ENST00000358495	protein_coding	ENST00000358495.7	c.1037C>A	ENSP00000351284.3:p.Ser346Ter	1176/2710	1037/1257	346/418	S/*	tCg/tAg	rs4987207&CM025484	1		-1		SNV	HGNC	HGNC:9824	YES	1	P3	CCDS8507.2	ENSP00000351284	P43351	Q5DR82	UPI0000133035		Ensembl	G	G
DO28412	RAD52	chr12	914052	rs4987207	G	T	1027.8	0/1	18,32	50	stop_gained	HIGH	RAD52	ENSG00000002016	Transcript	ENST00000358495	protein_coding	ENST00000358495.7	c.1037C>A	ENSP00000351284.3:p.Ser346Ter	1176/2710	1037/1257	346/418	S/*	tCg/tAg	rs4987207&CM025484	1		-1		SNV	HGNC	HGNC:9824	YES	1	P3	CCDS8507.2	ENSP00000351284	P43351	Q5DR82	UPI0000133035		Ensembl	G	G
SHGSOC088	RAD52	chr12	927224	rs201623936	C	T	155.8	0/1	21,7	28	missense_variant	MODERATE	RAD52	ENSG00000002016	Transcript	ENST00000358495	protein_coding	ENST00000358495.7	c.388G>A	ENSP00000351284.3:p.Glu130Lys	527/2710	388/1257	130/418	E/K	Gag/Aag	rs201623936	1		-1		SNV	HGNC	HGNC:9824	YES	1	P3	CCDS8507.2	ENSP00000351284	P43351	Q5DR82	UPI0000133035		Ensembl	C	C			deleterious(0)	probably_damaging(0.994)
DO28089	RAD54B	chr8	94407601	rs199681795	A	C	32.8	0/1	92,23	115	missense_variant	MODERATE	RAD54B	ENSG00000197275	Transcript	ENST00000336148	protein_coding	ENST00000336148.9	c.619T>G	ENSP00000336606.5:p.Cys207Gly	744/3068	619/2733	207/910	C/G	Tgt/Ggt	rs199681795	1		-1		SNV	HGNC	HGNC:17228	YES	1	P1	CCDS6262.1	ENSP00000336606	Q9Y620		UPI0000070088		Ensembl	A	A		1	deleterious(0.05)	possibly_damaging(0.452)
DO28412	RAD54B	chr8	94399549	rs539803935	G	A	411.8	0/1	20,14	34	missense_variant	MODERATE	RAD54B	ENSG00000197275	Transcript	ENST00000336148	protein_coding	ENST00000336148.9	c.1243C>T	ENSP00000336606.5:p.Arg415Cys	1368/3068	1243/2733	415/910	R/C	Cgt/Tgt	rs539803935&COSM4462376	1		-1		SNV	HGNC	HGNC:17228	YES	1	P1	CCDS6262.1	ENSP00000336606	Q9Y620		UPI0000070088		Ensembl	G	G		1	deleterious(0)	probably_damaging(1)
SHGSOC082	RAD54B	chr8	94400263	.	C	T	1065.8	0/1	18,33	51	missense_variant	MODERATE	RAD54B	ENSG00000197275	Transcript	ENST00000336148	protein_coding	ENST00000336148.9	c.1145G>A	ENSP00000336606.5:p.Arg382Lys	1270/3068	1145/2733	382/910	R/K	aGg/aAg		1		-1		SNV	HGNC	HGNC:17228	YES	1	P1	CCDS6262.1	ENSP00000336606	Q9Y620		UPI0000070088		Ensembl	C	C		1	deleterious(0.04)	probably_damaging(0.984)
AOCS_157	RAD54L	chr1	46258674	.	CTTTCTTTTTAGGAAGCATTTATTCGAAGCATTTTGTCAAAGCCTTTCAAAGTCCCCATTCCAAATTATCAAGGTAAAATGGAGGTT	C	574.7	0/1	31,18	49	splice_donor_variant&splice_acceptor_variant&coding_sequence_variant&intron_variant	HIGH	RAD54L	ENSG00000085999	Transcript	ENST00000371975	protein_coding	ENST00000371975.8	c.211-6_271+19del		-/3108	-/2244	-/747				1		1		deletion	HGNC	HGNC:9826	YES	1	P1	CCDS532.1	ENSP00000361043	Q92698		UPI0000378007		Ensembl	TTTCTTTTTAGGAAGCATTTATTCGAAGCATTTTGTCAAAGCCTTTCAAAGTCCCCATTCCAAATTATCAAGGTAAAATGGAGGTT	TTTCTTTTTAGGAAGCATTTATTCGAAGCATTTTGTCAAAGCCTTTCAAAGTCCCCATTCCAAATTATCAAGGTAAAATGGAGGTT		1
DO28004	RPA1	chr17	1875774	rs770690221	C	T	711.8	0/1	15,23	38	missense_variant	MODERATE	RPA1	ENSG00000132383	Transcript	ENST00000254719	protein_coding	ENST00000254719.9	c.568C>T	ENSP00000254719.4:p.Leu190Phe	678/4340	568/1851	190/616	L/F	Ctc/Ttc	rs770690221	1		1		SNV	HGNC	HGNC:10289	YES	1	P1	CCDS11014.1	ENSP00000254719	P27694		UPI000013379A		Ensembl	C	C			deleterious(0)	probably_damaging(1)
AOCS_163	RPA2	chr1	27914137	rs28988897	C	T	303.8	0/1	10,12	22	missense_variant	MODERATE	RPA2	ENSG00000117748	Transcript	ENST00000373909	protein_coding	ENST00000373909.7	c.67G>A	ENSP00000363017.3:p.Gly23Arg	153/1162	67/837	23/278	G/R	Ggg/Agg	rs28988897	1		-1		SNV	HGNC	HGNC:10290	YES	3		CCDS72740.1	ENSP00000363017	P15927		UPI00002055B5		Ensembl	C	C			deleterious(0.01)	possibly_damaging(0.638)
SHGSOC078	RPA2	chr1	27914137	rs28988897	C	T	386.8	0/1	13,14	27	missense_variant	MODERATE	RPA2	ENSG00000117748	Transcript	ENST00000373909	protein_coding	ENST00000373909.7	c.67G>A	ENSP00000363017.3:p.Gly23Arg	153/1162	67/837	23/278	G/R	Ggg/Agg	rs28988897	1		-1		SNV	HGNC	HGNC:10290	YES	3		CCDS72740.1	ENSP00000363017	P15927		UPI00002055B5		Ensembl	C	C			deleterious(0.01)	possibly_damaging(0.638)
SHGSOC099	RPA2	chr1	27914137	rs28988897	C	T	757.8	0/1	14,25	39	missense_variant	MODERATE	RPA2	ENSG00000117748	Transcript	ENST00000373909	protein_coding	ENST00000373909.7	c.67G>A	ENSP00000363017.3:p.Gly23Arg	153/1162	67/837	23/278	G/R	Ggg/Agg	rs28988897	1		-1		SNV	HGNC	HGNC:10290	YES	3		CCDS72740.1	ENSP00000363017	P15927		UPI00002055B5		Ensembl	C	C			deleterious(0.01)	possibly_damaging(0.638)
AOCS_106	SSBP1	chr7	141764229	rs146979075	A	G	751.8	0/1	23,25	48	missense_variant	MODERATE	TAS2R3	ENSG00000127362	Transcript	ENST00000247879	protein_coding	ENST00000247879.2	c.71A>G	ENSP00000247879.2:p.Asn24Ser	133/1101	71/951	24/316	N/S	aAt/aGt	rs146979075	1		1		SNV	HGNC	HGNC:14910	YES		P1	CCDS5867.1	ENSP00000247879	Q9NYW6		UPI0000038B0B		Ensembl	A	A			deleterious(0)	probably_damaging(0.996)
DO31551	SSBP1	chr7	141778891	rs142313979	G	C	429.8	0/1	13,15	28	missense_variant	MODERATE	TAS2R4	ENSG00000127364	Transcript	ENST00000247881	protein_coding	ENST00000247881.3	c.403G>C	ENSP00000247881.2:p.Ala135Pro	450/2378	403/900	135/299	A/P	Gcc/Ccc	rs142313979	1		1		SNV	HGNC	HGNC:14911	YES		P1	CCDS5868.1	ENSP00000247881	Q9NYW5		UPI0000038B0C		Ensembl	G	G			tolerated(0.06)	possibly_damaging(0.876)
SHGSOC034	SSBP1	chr7	141764499	.	T	C	509.8	0/1	23,18	41	missense_variant	MODERATE	TAS2R3	ENSG00000127362	Transcript	ENST00000247879	protein_coding	ENST00000247879.2	c.341T>C	ENSP00000247879.2:p.Phe114Ser	403/1101	341/951	114/316	F/S	tTc/tCc		1		1		SNV	HGNC	HGNC:14910	YES		P1	CCDS5867.1	ENSP00000247879	Q9NYW6		UPI0000038B0B		Ensembl	T	T			deleterious(0)	probably_damaging(0.993)
SHGSOC043	SSBP1	chr7	141764263	rs138466830	G	A	398.8	0/1	16,14	30	stop_gained	HIGH	TAS2R3	ENSG00000127362	Transcript	ENST00000247879	protein_coding	ENST00000247879.2	c.105G>A	ENSP00000247879.2:p.Trp35Ter	167/1101	105/951	35/316	W/*	tgG/tgA	rs138466830	1		1		SNV	HGNC	HGNC:14910	YES		P1	CCDS5867.1	ENSP00000247879	Q9NYW6		UPI0000038B0B		Ensembl	G	G
SHGSOC076	SSBP1	chr7	141764263	rs138466830	G	A	739.8	0/1	22,25	47	stop_gained	HIGH	TAS2R3	ENSG00000127362	Transcript	ENST00000247879	protein_coding	ENST00000247879.2	c.105G>A	ENSP00000247879.2:p.Trp35Ter	167/1101	105/951	35/316	W/*	tgG/tgA	rs138466830	1		1		SNV	HGNC	HGNC:14910	YES		P1	CCDS5867.1	ENSP00000247879	Q9NYW6		UPI0000038B0B		Ensembl	G	G
AOCS_106	TOP3A	chr17	18290928	rs61753153	C	T	661.8	0/1	16,17	33	missense_variant	MODERATE	TOP3A	ENSG00000177302	Transcript	ENST00000542570	protein_coding	ENST00000542570.5	c.1381G>A	ENSP00000442336.2:p.Ala461Thr	1610/4116	1381/3006	461/1001	A/T	Gct/Act	rs61753153	1		-1		SNV	HGNC	HGNC:11992	YES	1	P1	CCDS11194.1	ENSP00000442336	Q13472		UPI00001371A0		Ensembl	C	C			deleterious(0.02)	possibly_damaging(0.869)
AOCS_158	TOP3A	chr17	18285268	rs34001746	A	C	306.8	0/1	18,14	32	missense_variant	MODERATE	TOP3A	ENSG00000177302	Transcript	ENST00000542570	protein_coding	ENST00000542570.5	c.1751T>G	ENSP00000442336.2:p.Leu584Arg	1980/4116	1751/3006	584/1001	L/R	cTc/cGc	rs34001746	1		-1		SNV	HGNC	HGNC:11992	YES	1	P1	CCDS11194.1	ENSP00000442336	Q13472		UPI00001371A0		Ensembl	A	A			deleterious(0.02)	possibly_damaging(0.62)
DO28093	TOP3A	chr17	18285268	rs34001746	A	C	277.8	0/1	12,13	25	missense_variant	MODERATE	TOP3A	ENSG00000177302	Transcript	ENST00000542570	protein_coding	ENST00000542570.5	c.1751T>G	ENSP00000442336.2:p.Leu584Arg	1980/4116	1751/3006	584/1001	L/R	cTc/cGc	rs34001746	1		-1		SNV	HGNC	HGNC:11992	YES	1	P1	CCDS11194.1	ENSP00000442336	Q13472		UPI00001371A0		Ensembl	A	A			deleterious(0.02)	possibly_damaging(0.62)
SHGSOC045	TOP3A	chr17	18285268	rs34001746	A	C	270.8	0/1	17,12	29	missense_variant	MODERATE	TOP3A	ENSG00000177302	Transcript	ENST00000542570	protein_coding	ENST00000542570.5	c.1751T>G	ENSP00000442336.2:p.Leu584Arg	1980/4116	1751/3006	584/1001	L/R	cTc/cGc	rs34001746	1		-1		SNV	HGNC	HGNC:11992	YES	1	P1	CCDS11194.1	ENSP00000442336	Q13472		UPI00001371A0		Ensembl	A	A			deleterious(0.02)	possibly_damaging(0.62)
SHGSOC054	TOP3A	chr17	18285268	rs34001746	A	C	356.8	0/1	19,17	36	missense_variant	MODERATE	TOP3A	ENSG00000177302	Transcript	ENST00000542570	protein_coding	ENST00000542570.5	c.1751T>G	ENSP00000442336.2:p.Leu584Arg	1980/4116	1751/3006	584/1001	L/R	cTc/cGc	rs34001746	1		-1		SNV	HGNC	HGNC:11992	YES	1	P1	CCDS11194.1	ENSP00000442336	Q13472		UPI00001371A0		Ensembl	A	A			deleterious(0.02)	possibly_damaging(0.62)
SHGSOC084	TOP3A	chr17	18285268	rs34001746	A	C	883.8	0/1	39,35	74	missense_variant	MODERATE	TOP3A	ENSG00000177302	Transcript	ENST00000542570	protein_coding	ENST00000542570.5	c.1751T>G	ENSP00000442336.2:p.Leu584Arg	1980/4116	1751/3006	584/1001	L/R	cTc/cGc	rs34001746	1		-1		SNV	HGNC	HGNC:11992	YES	1	P1	CCDS11194.1	ENSP00000442336	Q13472		UPI00001371A0		Ensembl	A	A			deleterious(0.02)	possibly_damaging(0.62)
SHGSOC101	TOP3A	chr17	18285268	rs34001746	A	C	416.8	0/1	13,18	31	missense_variant	MODERATE	TOP3A	ENSG00000177302	Transcript	ENST00000542570	protein_coding	ENST00000542570.5	c.1751T>G	ENSP00000442336.2:p.Leu584Arg	1980/4116	1751/3006	584/1001	L/R	cTc/cGc	rs34001746	1		-1		SNV	HGNC	HGNC:11992	YES	1	P1	CCDS11194.1	ENSP00000442336	Q13472		UPI00001371A0		Ensembl	A	A			deleterious(0.02)	possibly_damaging(0.62)
AOCS_097	TOP3B	chr22	21957256	rs774350862	G	A	24.8	0/1	11,3	14	missense_variant	MODERATE	TOP3B	ENSG00000100038	Transcript	ENST00000398793	protein_coding	ENST00000398793.6	c.2447C>T	ENSP00000381773.2:p.Ala816Val	2882/3107	2447/2589	816/862	A/V	gCg/gTg	rs774350862	1		-1		SNV	HGNC	HGNC:11993	YES	1	P1	CCDS13797.1	ENSP00000381773	O95985	A0A024R1C2	UPI00001371A1		Ensembl	G	G			deleterious(0.02)	possibly_damaging(0.866)
AOCS_170	TOP3B	chr22	21957256	rs774350862	G	A	79.8	0/1	12,5	17	missense_variant	MODERATE	TOP3B	ENSG00000100038	Transcript	ENST00000398793	protein_coding	ENST00000398793.6	c.2447C>T	ENSP00000381773.2:p.Ala816Val	2882/3107	2447/2589	816/862	A/V	gCg/gTg	rs774350862	1		-1		SNV	HGNC	HGNC:11993	YES	1	P1	CCDS13797.1	ENSP00000381773	O95985	A0A024R1C2	UPI00001371A1		Ensembl	G	G			deleterious(0.02)	possibly_damaging(0.866)
DO28763	TOP3B	chr22	21957256	rs774350862	G	A	36.8	0/1	7,3	10	missense_variant	MODERATE	TOP3B	ENSG00000100038	Transcript	ENST00000398793	protein_coding	ENST00000398793.6	c.2447C>T	ENSP00000381773.2:p.Ala816Val	2882/3107	2447/2589	816/862	A/V	gCg/gTg	rs774350862	1		-1		SNV	HGNC	HGNC:11993	YES	1	P1	CCDS13797.1	ENSP00000381773	O95985	A0A024R1C2	UPI00001371A1		Ensembl	G	G			deleterious(0.02)	possibly_damaging(0.866)
SHGSOC037	TOP3B	chr22	21957256	rs774350862	G	A	20.8	0/1	15,4	19	missense_variant	MODERATE	TOP3B	ENSG00000100038	Transcript	ENST00000398793	protein_coding	ENST00000398793.6	c.2447C>T	ENSP00000381773.2:p.Ala816Val	2882/3107	2447/2589	816/862	A/V	gCg/gTg	rs774350862	1		-1		SNV	HGNC	HGNC:11993	YES	1	P1	CCDS13797.1	ENSP00000381773	O95985	A0A024R1C2	UPI00001371A1		Ensembl	G	G			deleterious(0.02)	possibly_damaging(0.866)
SHGSOC102	TOP3B	chr22	21963992	rs143308485	G	A	390.8	0/1	19,17	36	missense_variant	MODERATE	TOP3B	ENSG00000100038	Transcript	ENST00000398793	protein_coding	ENST00000398793.6	c.1135C>T	ENSP00000381773.2:p.Arg379Trp	1570/3107	1135/2589	379/862	R/W	Cgg/Tgg	rs143308485	1		-1		SNV	HGNC	HGNC:11993	YES	1	P1	CCDS13797.1	ENSP00000381773	O95985	A0A024R1C2	UPI00001371A1		Ensembl	G	G			deleterious(0)	probably_damaging(0.995)
AOCS_056	XRCC3	chr14	103699416	rs861539	G	A	702.8	0/1	23,23	46	missense_variant	MODERATE	XRCC3	ENSG00000126215	Transcript	ENST00000553264	protein_coding	ENST00000553264.5	c.722C>T	ENSP00000451974.1:p.Thr241Met	1519/3018	722/1041	241/346	T/M	aCg/aTg	rs861539&CM003625	1		-1		SNV	HGNC	HGNC:12830	YES	2	P1	CCDS9984.1	ENSP00000451974	O43542	Q53XC8	UPI000000CC78		Ensembl	G	G		1	tolerated(0.17)	benign(0.19)
AOCS_058	XRCC3	chr14	103699416	rs861539	G	A	495.8	0/1	19,17	36	missense_variant	MODERATE	XRCC3	ENSG00000126215	Transcript	ENST00000553264	protein_coding	ENST00000553264.5	c.722C>T	ENSP00000451974.1:p.Thr241Met	1519/3018	722/1041	241/346	T/M	aCg/aTg	rs861539&CM003625	1		-1		SNV	HGNC	HGNC:12830	YES	2	P1	CCDS9984.1	ENSP00000451974	O43542	Q53XC8	UPI000000CC78		Ensembl	G	G		1	tolerated(0.17)	benign(0.19)
AOCS_059	XRCC3	chr14	103699416	rs861539	G	A	333.8	0/1	13,12	25	missense_variant	MODERATE	XRCC3	ENSG00000126215	Transcript	ENST00000553264	protein_coding	ENST00000553264.5	c.722C>T	ENSP00000451974.1:p.Thr241Met	1519/3018	722/1041	241/346	T/M	aCg/aTg	rs861539&CM003625	1		-1		SNV	HGNC	HGNC:12830	YES	2	P1	CCDS9984.1	ENSP00000451974	O43542	Q53XC8	UPI000000CC78		Ensembl	G	G		1	tolerated(0.17)	benign(0.19)
AOCS_060	XRCC3	chr14	103699416	rs861539	G	A	223.8	0/1	10,9	19	missense_variant	MODERATE	XRCC3	ENSG00000126215	Transcript	ENST00000553264	protein_coding	ENST00000553264.5	c.722C>T	ENSP00000451974.1:p.Thr241Met	1519/3018	722/1041	241/346	T/M	aCg/aTg	rs861539&CM003625	1		-1		SNV	HGNC	HGNC:12830	YES	2	P1	CCDS9984.1	ENSP00000451974	O43542	Q53XC8	UPI000000CC78		Ensembl	G	G		1	tolerated(0.17)	benign(0.19)
AOCS_063	XRCC3	chr14	103699416	rs861539	G	A	703.8	0/1	23,24	47	missense_variant	MODERATE	XRCC3	ENSG00000126215	Transcript	ENST00000553264	protein_coding	ENST00000553264.5	c.722C>T	ENSP00000451974.1:p.Thr241Met	1519/3018	722/1041	241/346	T/M	aCg/aTg	rs861539&CM003625	1		-1		SNV	HGNC	HGNC:12830	YES	2	P1	CCDS9984.1	ENSP00000451974	O43542	Q53XC8	UPI000000CC78		Ensembl	G	G		1	tolerated(0.17)	benign(0.19)
AOCS_063	XRCC3	chr14	103711084	.	C	A	657.8	0/1	26,24	50	missense_variant	MODERATE	XRCC3	ENSG00000126215	Transcript	ENST00000553264	protein_coding	ENST00000553264.5	c.4G>T	ENSP00000451974.1:p.Asp2Tyr	801/3018	4/1041	2/346	D/Y	Gat/Tat		1		-1		SNV	HGNC	HGNC:12830	YES	2	P1	CCDS9984.1	ENSP00000451974	O43542	Q53XC8	UPI000000CC78		Ensembl	C	C		1	deleterious(0)	probably_damaging(0.915)
AOCS_064	XRCC3	chr14	103699416	rs861539	G	A	201.8	0/1	13,8	21	missense_variant	MODERATE	XRCC3	ENSG00000126215	Transcript	ENST00000553264	protein_coding	ENST00000553264.5	c.722C>T	ENSP00000451974.1:p.Thr241Met	1519/3018	722/1041	241/346	T/M	aCg/aTg	rs861539&CM003625	1		-1		SNV	HGNC	HGNC:12830	YES	2	P1	CCDS9984.1	ENSP00000451974	O43542	Q53XC8	UPI000000CC78		Ensembl	G	G		1	tolerated(0.17)	benign(0.19)
AOCS_065	XRCC3	chr14	103699416	rs861539	G	A	560.8	0/1	21,19	40	missense_variant	MODERATE	XRCC3	ENSG00000126215	Transcript	ENST00000553264	protein_coding	ENST00000553264.5	c.722C>T	ENSP00000451974.1:p.Thr241Met	1519/3018	722/1041	241/346	T/M	aCg/aTg	rs861539&CM003625	1		-1		SNV	HGNC	HGNC:12830	YES	2	P1	CCDS9984.1	ENSP00000451974	O43542	Q53XC8	UPI000000CC78		Ensembl	G	G		1	tolerated(0.17)	benign(0.19)
AOCS_075	XRCC3	chr14	103699416	rs861539	G	A	789.8	0/1	23,26	49	missense_variant	MODERATE	XRCC3	ENSG00000126215	Transcript	ENST00000553264	protein_coding	ENST00000553264.5	c.722C>T	ENSP00000451974.1:p.Thr241Met	1519/3018	722/1041	241/346	T/M	aCg/aTg	rs861539&CM003625	1		-1		SNV	HGNC	HGNC:12830	YES	2	P1	CCDS9984.1	ENSP00000451974	O43542	Q53XC8	UPI000000CC78		Ensembl	G	G		1	tolerated(0.17)	benign(0.19)
AOCS_076	XRCC3	chr14	103699416	rs861539	G	A	343.8	0/1	20,13	33	missense_variant	MODERATE	XRCC3	ENSG00000126215	Transcript	ENST00000553264	protein_coding	ENST00000553264.5	c.722C>T	ENSP00000451974.1:p.Thr241Met	1519/3018	722/1041	241/346	T/M	aCg/aTg	rs861539&CM003625	1		-1		SNV	HGNC	HGNC:12830	YES	2	P1	CCDS9984.1	ENSP00000451974	O43542	Q53XC8	UPI000000CC78		Ensembl	G	G		1	tolerated(0.17)	benign(0.19)
AOCS_077	XRCC3	chr14	103699416	rs861539	G	A	445.8	0/1	14,16	30	missense_variant	MODERATE	XRCC3	ENSG00000126215	Transcript	ENST00000553264	protein_coding	ENST00000553264.5	c.722C>T	ENSP00000451974.1:p.Thr241Met	1519/3018	722/1041	241/346	T/M	aCg/aTg	rs861539&CM003625	1		-1		SNV	HGNC	HGNC:12830	YES	2	P1	CCDS9984.1	ENSP00000451974	O43542	Q53XC8	UPI000000CC78		Ensembl	G	G		1	tolerated(0.17)	benign(0.19)
AOCS_078	XRCC3	chr14	103699416	rs861539	G	A	498.8	0/1	14,17	31	missense_variant	MODERATE	XRCC3	ENSG00000126215	Transcript	ENST00000553264	protein_coding	ENST00000553264.5	c.722C>T	ENSP00000451974.1:p.Thr241Met	1519/3018	722/1041	241/346	T/M	aCg/aTg	rs861539&CM003625	1		-1		SNV	HGNC	HGNC:12830	YES	2	P1	CCDS9984.1	ENSP00000451974	O43542	Q53XC8	UPI000000CC78		Ensembl	G	G		1	tolerated(0.17)	benign(0.19)
AOCS_079	XRCC3	chr14	103699416	rs861539	G	A	372.8	0/1	14,13	27	missense_variant	MODERATE	XRCC3	ENSG00000126215	Transcript	ENST00000553264	protein_coding	ENST00000553264.5	c.722C>T	ENSP00000451974.1:p.Thr241Met	1519/3018	722/1041	241/346	T/M	aCg/aTg	rs861539&CM003625	1		-1		SNV	HGNC	HGNC:12830	YES	2	P1	CCDS9984.1	ENSP00000451974	O43542	Q53XC8	UPI000000CC78		Ensembl	G	G		1	tolerated(0.17)	benign(0.19)
AOCS_081	XRCC3	chr14	103699416	rs861539	G	A	340.8	0/1	15,12	27	missense_variant	MODERATE	XRCC3	ENSG00000126215	Transcript	ENST00000553264	protein_coding	ENST00000553264.5	c.722C>T	ENSP00000451974.1:p.Thr241Met	1519/3018	722/1041	241/346	T/M	aCg/aTg	rs861539&CM003625	1		-1		SNV	HGNC	HGNC:12830	YES	2	P1	CCDS9984.1	ENSP00000451974	O43542	Q53XC8	UPI000000CC78		Ensembl	G	G		1	tolerated(0.17)	benign(0.19)
AOCS_083	XRCC3	chr14	103699416	rs861539	G	A	390.8	0/1	20,15	35	missense_variant	MODERATE	XRCC3	ENSG00000126215	Transcript	ENST00000553264	protein_coding	ENST00000553264.5	c.722C>T	ENSP00000451974.1:p.Thr241Met	1519/3018	722/1041	241/346	T/M	aCg/aTg	rs861539&CM003625	1		-1		SNV	HGNC	HGNC:12830	YES	2	P1	CCDS9984.1	ENSP00000451974	O43542	Q53XC8	UPI000000CC78		Ensembl	G	G		1	tolerated(0.17)	benign(0.19)
AOCS_085	XRCC3	chr14	103699416	rs861539	G	A	495.8	0/1	8,16	24	missense_variant	MODERATE	XRCC3	ENSG00000126215	Transcript	ENST00000553264	protein_coding	ENST00000553264.5	c.722C>T	ENSP00000451974.1:p.Thr241Met	1519/3018	722/1041	241/346	T/M	aCg/aTg	rs861539&CM003625	1		-1		SNV	HGNC	HGNC:12830	YES	2	P1	CCDS9984.1	ENSP00000451974	O43542	Q53XC8	UPI000000CC78		Ensembl	G	G		1	tolerated(0.17)	benign(0.19)
AOCS_094	XRCC3	chr14	103699416	rs861539	G	A	261.8	0/1	6,10	16	missense_variant	MODERATE	XRCC3	ENSG00000126215	Transcript	ENST00000553264	protein_coding	ENST00000553264.5	c.722C>T	ENSP00000451974.1:p.Thr241Met	1519/3018	722/1041	241/346	T/M	aCg/aTg	rs861539&CM003625	1		-1		SNV	HGNC	HGNC:12830	YES	2	P1	CCDS9984.1	ENSP00000451974	O43542	Q53XC8	UPI000000CC78		Ensembl	G	G		1	tolerated(0.17)	benign(0.19)
AOCS_095	XRCC3	chr14	103699416	rs861539	G	A	972.8	1/1	0,29	29	missense_variant	MODERATE	XRCC3	ENSG00000126215	Transcript	ENST00000553264	protein_coding	ENST00000553264.5	c.722C>T	ENSP00000451974.1:p.Thr241Met	1519/3018	722/1041	241/346	T/M	aCg/aTg	rs861539&CM003625	1		-1		SNV	HGNC	HGNC:12830	YES	2	P1	CCDS9984.1	ENSP00000451974	O43542	Q53XC8	UPI000000CC78		Ensembl	G	G		1	tolerated(0.17)	benign(0.19)
AOCS_096	XRCC3	chr14	103699416	rs861539	G	A	993.8	1/1	0,29	29	missense_variant	MODERATE	XRCC3	ENSG00000126215	Transcript	ENST00000553264	protein_coding	ENST00000553264.5	c.722C>T	ENSP00000451974.1:p.Thr241Met	1519/3018	722/1041	241/346	T/M	aCg/aTg	rs861539&CM003625	1		-1		SNV	HGNC	HGNC:12830	YES	2	P1	CCDS9984.1	ENSP00000451974	O43542	Q53XC8	UPI000000CC78		Ensembl	G	G		1	tolerated(0.17)	benign(0.19)
AOCS_097	XRCC3	chr14	103699416	rs861539	G	A	387.8	0/1	21,14	35	missense_variant	MODERATE	XRCC3	ENSG00000126215	Transcript	ENST00000553264	protein_coding	ENST00000553264.5	c.722C>T	ENSP00000451974.1:p.Thr241Met	1519/3018	722/1041	241/346	T/M	aCg/aTg	rs861539&CM003625	1		-1		SNV	HGNC	HGNC:12830	YES	2	P1	CCDS9984.1	ENSP00000451974	O43542	Q53XC8	UPI000000CC78		Ensembl	G	G		1	tolerated(0.17)	benign(0.19)
AOCS_104	XRCC3	chr14	103699416	rs861539	G	A	785.8	0/1	17,26	43	missense_variant	MODERATE	XRCC3	ENSG00000126215	Transcript	ENST00000553264	protein_coding	ENST00000553264.5	c.722C>T	ENSP00000451974.1:p.Thr241Met	1519/3018	722/1041	241/346	T/M	aCg/aTg	rs861539&CM003625	1		-1		SNV	HGNC	HGNC:12830	YES	2	P1	CCDS9984.1	ENSP00000451974	O43542	Q53XC8	UPI000000CC78		Ensembl	G	G		1	tolerated(0.17)	benign(0.19)
AOCS_105	XRCC3	chr14	103699416	rs861539	G	A	413.8	0/1	11,15	26	missense_variant	MODERATE	XRCC3	ENSG00000126215	Transcript	ENST00000553264	protein_coding	ENST00000553264.5	c.722C>T	ENSP00000451974.1:p.Thr241Met	1519/3018	722/1041	241/346	T/M	aCg/aTg	rs861539&CM003625	1		-1		SNV	HGNC	HGNC:12830	YES	2	P1	CCDS9984.1	ENSP00000451974	O43542	Q53XC8	UPI000000CC78		Ensembl	G	G		1	tolerated(0.17)	benign(0.19)
AOCS_106	XRCC3	chr14	103699416	rs861539	G	A	554.8	0/1	16,18	34	missense_variant	MODERATE	XRCC3	ENSG00000126215	Transcript	ENST00000553264	protein_coding	ENST00000553264.5	c.722C>T	ENSP00000451974.1:p.Thr241Met	1519/3018	722/1041	241/346	T/M	aCg/aTg	rs861539&CM003625	1		-1		SNV	HGNC	HGNC:12830	YES	2	P1	CCDS9984.1	ENSP00000451974	O43542	Q53XC8	UPI000000CC78		Ensembl	G	G		1	tolerated(0.17)	benign(0.19)
AOCS_108	XRCC3	chr14	103699416	rs861539	G	A	662.8	0/1	19,21	40	missense_variant	MODERATE	XRCC3	ENSG00000126215	Transcript	ENST00000553264	protein_coding	ENST00000553264.5	c.722C>T	ENSP00000451974.1:p.Thr241Met	1519/3018	722/1041	241/346	T/M	aCg/aTg	rs861539&CM003625	1		-1		SNV	HGNC	HGNC:12830	YES	2	P1	CCDS9984.1	ENSP00000451974	O43542	Q53XC8	UPI000000CC78		Ensembl	G	G		1	tolerated(0.17)	benign(0.19)
AOCS_111	XRCC3	chr14	103699416	rs861539	G	A	497.8	0/1	10,17	27	missense_variant	MODERATE	XRCC3	ENSG00000126215	Transcript	ENST00000553264	protein_coding	ENST00000553264.5	c.722C>T	ENSP00000451974.1:p.Thr241Met	1519/3018	722/1041	241/346	T/M	aCg/aTg	rs861539&CM003625	1		-1		SNV	HGNC	HGNC:12830	YES	2	P1	CCDS9984.1	ENSP00000451974	O43542	Q53XC8	UPI000000CC78		Ensembl	G	G		1	tolerated(0.17)	benign(0.19)
AOCS_112	XRCC3	chr14	103699416	rs861539	G	A	373.8	0/1	18,15	33	missense_variant	MODERATE	XRCC3	ENSG00000126215	Transcript	ENST00000553264	protein_coding	ENST00000553264.5	c.722C>T	ENSP00000451974.1:p.Thr241Met	1519/3018	722/1041	241/346	T/M	aCg/aTg	rs861539&CM003625	1		-1		SNV	HGNC	HGNC:12830	YES	2	P1	CCDS9984.1	ENSP00000451974	O43542	Q53XC8	UPI000000CC78		Ensembl	G	G		1	tolerated(0.17)	benign(0.19)
AOCS_123	XRCC3	chr14	103699416	rs861539	G	A	340.8	0/1	15,12	27	missense_variant	MODERATE	XRCC3	ENSG00000126215	Transcript	ENST00000553264	protein_coding	ENST00000553264.5	c.722C>T	ENSP00000451974.1:p.Thr241Met	1519/3018	722/1041	241/346	T/M	aCg/aTg	rs861539&CM003625	1		-1		SNV	HGNC	HGNC:12830	YES	2	P1	CCDS9984.1	ENSP00000451974	O43542	Q53XC8	UPI000000CC78		Ensembl	G	G		1	tolerated(0.17)	benign(0.19)
AOCS_124	XRCC3	chr14	103699416	rs861539	G	A	1540.8	1/1	0,44	44	missense_variant	MODERATE	XRCC3	ENSG00000126215	Transcript	ENST00000553264	protein_coding	ENST00000553264.5	c.722C>T	ENSP00000451974.1:p.Thr241Met	1519/3018	722/1041	241/346	T/M	aCg/aTg	rs861539&CM003625	1		-1		SNV	HGNC	HGNC:12830	YES	2	P1	CCDS9984.1	ENSP00000451974	O43542	Q53XC8	UPI000000CC78		Ensembl	G	G		1	tolerated(0.17)	benign(0.19)
AOCS_126	XRCC3	chr14	103699416	rs861539	G	A	505.8	0/1	16,17	33	missense_variant	MODERATE	XRCC3	ENSG00000126215	Transcript	ENST00000553264	protein_coding	ENST00000553264.5	c.722C>T	ENSP00000451974.1:p.Thr241Met	1519/3018	722/1041	241/346	T/M	aCg/aTg	rs861539&CM003625	1		-1		SNV	HGNC	HGNC:12830	YES	2	P1	CCDS9984.1	ENSP00000451974	O43542	Q53XC8	UPI000000CC78		Ensembl	G	G		1	tolerated(0.17)	benign(0.19)
AOCS_128	XRCC3	chr14	103699416	rs861539	G	A	507.8	0/1	22,18	40	missense_variant	MODERATE	XRCC3	ENSG00000126215	Transcript	ENST00000553264	protein_coding	ENST00000553264.5	c.722C>T	ENSP00000451974.1:p.Thr241Met	1519/3018	722/1041	241/346	T/M	aCg/aTg	rs861539&CM003625	1		-1		SNV	HGNC	HGNC:12830	YES	2	P1	CCDS9984.1	ENSP00000451974	O43542	Q53XC8	UPI000000CC78		Ensembl	G	G		1	tolerated(0.17)	benign(0.19)
AOCS_130	XRCC3	chr14	103699416	rs861539	G	A	543.8	0/1	12,19	31	missense_variant	MODERATE	XRCC3	ENSG00000126215	Transcript	ENST00000553264	protein_coding	ENST00000553264.5	c.722C>T	ENSP00000451974.1:p.Thr241Met	1519/3018	722/1041	241/346	T/M	aCg/aTg	rs861539&CM003625	1		-1		SNV	HGNC	HGNC:12830	YES	2	P1	CCDS9984.1	ENSP00000451974	O43542	Q53XC8	UPI000000CC78		Ensembl	G	G		1	tolerated(0.17)	benign(0.19)
AOCS_133	XRCC3	chr14	103699416	rs861539	G	A	515.8	0/1	16,18	34	missense_variant	MODERATE	XRCC3	ENSG00000126215	Transcript	ENST00000553264	protein_coding	ENST00000553264.5	c.722C>T	ENSP00000451974.1:p.Thr241Met	1519/3018	722/1041	241/346	T/M	aCg/aTg	rs861539&CM003625	1		-1		SNV	HGNC	HGNC:12830	YES	2	P1	CCDS9984.1	ENSP00000451974	O43542	Q53XC8	UPI000000CC78		Ensembl	G	G		1	tolerated(0.17)	benign(0.19)
AOCS_144	XRCC3	chr14	103699416	rs861539	G	A	553.8	0/1	12,18	30	missense_variant	MODERATE	XRCC3	ENSG00000126215	Transcript	ENST00000553264	protein_coding	ENST00000553264.5	c.722C>T	ENSP00000451974.1:p.Thr241Met	1519/3018	722/1041	241/346	T/M	aCg/aTg	rs861539&CM003625	1		-1		SNV	HGNC	HGNC:12830	YES	2	P1	CCDS9984.1	ENSP00000451974	O43542	Q53XC8	UPI000000CC78		Ensembl	G	G		1	tolerated(0.17)	benign(0.19)
AOCS_147	XRCC3	chr14	103699416	rs861539	G	A	465.8	0/1	25,17	42	missense_variant	MODERATE	XRCC3	ENSG00000126215	Transcript	ENST00000553264	protein_coding	ENST00000553264.5	c.722C>T	ENSP00000451974.1:p.Thr241Met	1519/3018	722/1041	241/346	T/M	aCg/aTg	rs861539&CM003625	1		-1		SNV	HGNC	HGNC:12830	YES	2	P1	CCDS9984.1	ENSP00000451974	O43542	Q53XC8	UPI000000CC78		Ensembl	G	G		1	tolerated(0.17)	benign(0.19)
AOCS_149	XRCC3	chr14	103699416	rs861539	G	A	203.8	0/1	13,8	21	missense_variant	MODERATE	XRCC3	ENSG00000126215	Transcript	ENST00000553264	protein_coding	ENST00000553264.5	c.722C>T	ENSP00000451974.1:p.Thr241Met	1519/3018	722/1041	241/346	T/M	aCg/aTg	rs861539&CM003625	1		-1		SNV	HGNC	HGNC:12830	YES	2	P1	CCDS9984.1	ENSP00000451974	O43542	Q53XC8	UPI000000CC78		Ensembl	G	G		1	tolerated(0.17)	benign(0.19)
AOCS_152	XRCC3	chr14	103699416	rs861539	G	A	1359.8	1/1	0,37	37	missense_variant	MODERATE	XRCC3	ENSG00000126215	Transcript	ENST00000553264	protein_coding	ENST00000553264.5	c.722C>T	ENSP00000451974.1:p.Thr241Met	1519/3018	722/1041	241/346	T/M	aCg/aTg	rs861539&CM003625	1		-1		SNV	HGNC	HGNC:12830	YES	2	P1	CCDS9984.1	ENSP00000451974	O43542	Q53XC8	UPI000000CC78		Ensembl	G	G		1	tolerated(0.17)	benign(0.19)
AOCS_159	XRCC3	chr14	103699416	rs861539	G	A	452.8	0/1	12,15	27	missense_variant	MODERATE	XRCC3	ENSG00000126215	Transcript	ENST00000553264	protein_coding	ENST00000553264.5	c.722C>T	ENSP00000451974.1:p.Thr241Met	1519/3018	722/1041	241/346	T/M	aCg/aTg	rs861539&CM003625	1		-1		SNV	HGNC	HGNC:12830	YES	2	P1	CCDS9984.1	ENSP00000451974	O43542	Q53XC8	UPI000000CC78		Ensembl	G	G		1	tolerated(0.17)	benign(0.19)
AOCS_160	XRCC3	chr14	103699416	rs861539	G	A	1133.8	1/1	0,32	32	missense_variant	MODERATE	XRCC3	ENSG00000126215	Transcript	ENST00000553264	protein_coding	ENST00000553264.5	c.722C>T	ENSP00000451974.1:p.Thr241Met	1519/3018	722/1041	241/346	T/M	aCg/aTg	rs861539&CM003625	1		-1		SNV	HGNC	HGNC:12830	YES	2	P1	CCDS9984.1	ENSP00000451974	O43542	Q53XC8	UPI000000CC78		Ensembl	G	G		1	tolerated(0.17)	benign(0.19)
AOCS_163	XRCC3	chr14	103699416	rs861539	G	A	383.8	0/1	11,14	25	missense_variant	MODERATE	XRCC3	ENSG00000126215	Transcript	ENST00000553264	protein_coding	ENST00000553264.5	c.722C>T	ENSP00000451974.1:p.Thr241Met	1519/3018	722/1041	241/346	T/M	aCg/aTg	rs861539&CM003625	1		-1		SNV	HGNC	HGNC:12830	YES	2	P1	CCDS9984.1	ENSP00000451974	O43542	Q53XC8	UPI000000CC78		Ensembl	G	G		1	tolerated(0.17)	benign(0.19)
AOCS_165	XRCC3	chr14	103699416	rs861539	G	A	821.8	0/1	21,26	47	missense_variant	MODERATE	XRCC3	ENSG00000126215	Transcript	ENST00000553264	protein_coding	ENST00000553264.5	c.722C>T	ENSP00000451974.1:p.Thr241Met	1519/3018	722/1041	241/346	T/M	aCg/aTg	rs861539&CM003625	1		-1		SNV	HGNC	HGNC:12830	YES	2	P1	CCDS9984.1	ENSP00000451974	O43542	Q53XC8	UPI000000CC78		Ensembl	G	G		1	tolerated(0.17)	benign(0.19)
AOCS_168	XRCC3	chr14	103699416	rs861539	G	A	254.8	0/1	18,11	29	missense_variant	MODERATE	XRCC3	ENSG00000126215	Transcript	ENST00000553264	protein_coding	ENST00000553264.5	c.722C>T	ENSP00000451974.1:p.Thr241Met	1519/3018	722/1041	241/346	T/M	aCg/aTg	rs861539&CM003625	1		-1		SNV	HGNC	HGNC:12830	YES	2	P1	CCDS9984.1	ENSP00000451974	O43542	Q53XC8	UPI000000CC78		Ensembl	G	G		1	tolerated(0.17)	benign(0.19)
AOCS_170	XRCC3	chr14	103699416	rs861539	G	A	197.8	0/1	18,10	28	missense_variant	MODERATE	XRCC3	ENSG00000126215	Transcript	ENST00000553264	protein_coding	ENST00000553264.5	c.722C>T	ENSP00000451974.1:p.Thr241Met	1519/3018	722/1041	241/346	T/M	aCg/aTg	rs861539&CM003625	1		-1		SNV	HGNC	HGNC:12830	YES	2	P1	CCDS9984.1	ENSP00000451974	O43542	Q53XC8	UPI000000CC78		Ensembl	G	G		1	tolerated(0.17)	benign(0.19)
AOCS_171	XRCC3	chr14	103699416	rs861539	G	A	492.8	0/1	17,17	34	missense_variant	MODERATE	XRCC3	ENSG00000126215	Transcript	ENST00000553264	protein_coding	ENST00000553264.5	c.722C>T	ENSP00000451974.1:p.Thr241Met	1519/3018	722/1041	241/346	T/M	aCg/aTg	rs861539&CM003625	1		-1		SNV	HGNC	HGNC:12830	YES	2	P1	CCDS9984.1	ENSP00000451974	O43542	Q53XC8	UPI000000CC78		Ensembl	G	G		1	tolerated(0.17)	benign(0.19)
DO27978	XRCC3	chr14	103699416	rs861539	G	A	487.8	0/1	36,18	54	missense_variant	MODERATE	XRCC3	ENSG00000126215	Transcript	ENST00000553264	protein_coding	ENST00000553264.5	c.722C>T	ENSP00000451974.1:p.Thr241Met	1519/3018	722/1041	241/346	T/M	aCg/aTg	rs861539&CM003625	1		-1		SNV	HGNC	HGNC:12830	YES	2	P1	CCDS9984.1	ENSP00000451974	O43542	Q53XC8	UPI000000CC78		Ensembl	G	G		1	tolerated(0.17)	benign(0.19)
DO28053	XRCC3	chr14	103699416	rs861539	G	A	703.8	0/1	20,25	45	missense_variant	MODERATE	XRCC3	ENSG00000126215	Transcript	ENST00000553264	protein_coding	ENST00000553264.5	c.722C>T	ENSP00000451974.1:p.Thr241Met	1519/3018	722/1041	241/346	T/M	aCg/aTg	rs861539&CM003625	1		-1		SNV	HGNC	HGNC:12830	YES	2	P1	CCDS9984.1	ENSP00000451974	O43542	Q53XC8	UPI000000CC78		Ensembl	G	G		1	tolerated(0.17)	benign(0.19)
DO28093	XRCC3	chr14	103699416	rs861539	G	A	238.8	0/1	10,9	19	missense_variant	MODERATE	XRCC3	ENSG00000126215	Transcript	ENST00000553264	protein_coding	ENST00000553264.5	c.722C>T	ENSP00000451974.1:p.Thr241Met	1519/3018	722/1041	241/346	T/M	aCg/aTg	rs861539&CM003625	1		-1		SNV	HGNC	HGNC:12830	YES	2	P1	CCDS9984.1	ENSP00000451974	O43542	Q53XC8	UPI000000CC78		Ensembl	G	G		1	tolerated(0.17)	benign(0.19)
DO28233	XRCC3	chr14	103699416	rs861539	G	A	254.8	0/1	8,9	17	missense_variant	MODERATE	XRCC3	ENSG00000126215	Transcript	ENST00000553264	protein_coding	ENST00000553264.5	c.722C>T	ENSP00000451974.1:p.Thr241Met	1519/3018	722/1041	241/346	T/M	aCg/aTg	rs861539&CM003625	1		-1		SNV	HGNC	HGNC:12830	YES	2	P1	CCDS9984.1	ENSP00000451974	O43542	Q53XC8	UPI000000CC78		Ensembl	G	G		1	tolerated(0.17)	benign(0.19)
DO28273	XRCC3	chr14	103699416	rs861539	G	A	355.8	0/1	8,13	21	missense_variant	MODERATE	XRCC3	ENSG00000126215	Transcript	ENST00000553264	protein_coding	ENST00000553264.5	c.722C>T	ENSP00000451974.1:p.Thr241Met	1519/3018	722/1041	241/346	T/M	aCg/aTg	rs861539&CM003625	1		-1		SNV	HGNC	HGNC:12830	YES	2	P1	CCDS9984.1	ENSP00000451974	O43542	Q53XC8	UPI000000CC78		Ensembl	G	G		1	tolerated(0.17)	benign(0.19)
DO28412	XRCC3	chr14	103699416	rs861539	G	A	898.8	0/1	18,28	46	missense_variant	MODERATE	XRCC3	ENSG00000126215	Transcript	ENST00000553264	protein_coding	ENST00000553264.5	c.722C>T	ENSP00000451974.1:p.Thr241Met	1519/3018	722/1041	241/346	T/M	aCg/aTg	rs861539&CM003625	1		-1		SNV	HGNC	HGNC:12830	YES	2	P1	CCDS9984.1	ENSP00000451974	O43542	Q53XC8	UPI000000CC78		Ensembl	G	G		1	tolerated(0.17)	benign(0.19)
DO28521	XRCC3	chr14	103699416	rs861539	G	A	620.8	0/1	22,21	43	missense_variant	MODERATE	XRCC3	ENSG00000126215	Transcript	ENST00000553264	protein_coding	ENST00000553264.5	c.722C>T	ENSP00000451974.1:p.Thr241Met	1519/3018	722/1041	241/346	T/M	aCg/aTg	rs861539&CM003625	1		-1		SNV	HGNC	HGNC:12830	YES	2	P1	CCDS9984.1	ENSP00000451974	O43542	Q53XC8	UPI000000CC78		Ensembl	G	G		1	tolerated(0.17)	benign(0.19)
DO28763	XRCC3	chr14	103699416	rs861539	G	A	361.8	0/1	13,12	25	missense_variant	MODERATE	XRCC3	ENSG00000126215	Transcript	ENST00000553264	protein_coding	ENST00000553264.5	c.722C>T	ENSP00000451974.1:p.Thr241Met	1519/3018	722/1041	241/346	T/M	aCg/aTg	rs861539&CM003625	1		-1		SNV	HGNC	HGNC:12830	YES	2	P1	CCDS9984.1	ENSP00000451974	O43542	Q53XC8	UPI000000CC78		Ensembl	G	G		1	tolerated(0.17)	benign(0.19)
DO28873	XRCC3	chr14	103699416	rs861539	G	A	762.8	0/1	26,28	54	missense_variant	MODERATE	XRCC3	ENSG00000126215	Transcript	ENST00000553264	protein_coding	ENST00000553264.5	c.722C>T	ENSP00000451974.1:p.Thr241Met	1519/3018	722/1041	241/346	T/M	aCg/aTg	rs861539&CM003625	1		-1		SNV	HGNC	HGNC:12830	YES	2	P1	CCDS9984.1	ENSP00000451974	O43542	Q53XC8	UPI000000CC78		Ensembl	G	G		1	tolerated(0.17)	benign(0.19)
DO28962	XRCC3	chr14	103699416	rs861539	G	A	665.8	0/1	26,24	50	missense_variant	MODERATE	XRCC3	ENSG00000126215	Transcript	ENST00000553264	protein_coding	ENST00000553264.5	c.722C>T	ENSP00000451974.1:p.Thr241Met	1519/3018	722/1041	241/346	T/M	aCg/aTg	rs861539&CM003625	1		-1		SNV	HGNC	HGNC:12830	YES	2	P1	CCDS9984.1	ENSP00000451974	O43542	Q53XC8	UPI000000CC78		Ensembl	G	G		1	tolerated(0.17)	benign(0.19)
DO29146	XRCC3	chr14	103698902	rs560239798	G	A	563.8	0/1	29,21	50	missense_variant	MODERATE	XRCC3	ENSG00000126215	Transcript	ENST00000553264	protein_coding	ENST00000553264.5	c.937C>T	ENSP00000451974.1:p.Arg313Trp	1734/3018	937/1041	313/346	R/W	Cgg/Tgg	rs560239798	1		-1		SNV	HGNC	HGNC:12830	YES	2	P1	CCDS9984.1	ENSP00000451974	O43542	Q53XC8	UPI000000CC78		Ensembl	G	G		1	deleterious(0)	probably_damaging(1)
DO29308	XRCC3	chr14	103699416	rs861539	G	A	861.8	1/1	0,24	24	missense_variant	MODERATE	XRCC3	ENSG00000126215	Transcript	ENST00000553264	protein_coding	ENST00000553264.5	c.722C>T	ENSP00000451974.1:p.Thr241Met	1519/3018	722/1041	241/346	T/M	aCg/aTg	rs861539&CM003625	1		-1		SNV	HGNC	HGNC:12830	YES	2	P1	CCDS9984.1	ENSP00000451974	O43542	Q53XC8	UPI000000CC78		Ensembl	G	G		1	tolerated(0.17)	benign(0.19)
DO29760	XRCC3	chr14	103699416	rs861539	G	A	1304.8	0/1	22,42	64	missense_variant	MODERATE	XRCC3	ENSG00000126215	Transcript	ENST00000553264	protein_coding	ENST00000553264.5	c.722C>T	ENSP00000451974.1:p.Thr241Met	1519/3018	722/1041	241/346	T/M	aCg/aTg	rs861539&CM003625	1		-1		SNV	HGNC	HGNC:12830	YES	2	P1	CCDS9984.1	ENSP00000451974	O43542	Q53XC8	UPI000000CC78		Ensembl	G	G		1	tolerated(0.17)	benign(0.19)
DO29820	XRCC3	chr14	103699416	rs861539	G	A	297.8	0/1	10,11	21	missense_variant	MODERATE	XRCC3	ENSG00000126215	Transcript	ENST00000553264	protein_coding	ENST00000553264.5	c.722C>T	ENSP00000451974.1:p.Thr241Met	1519/3018	722/1041	241/346	T/M	aCg/aTg	rs861539&CM003625	1		-1		SNV	HGNC	HGNC:12830	YES	2	P1	CCDS9984.1	ENSP00000451974	O43542	Q53XC8	UPI000000CC78		Ensembl	G	G		1	tolerated(0.17)	benign(0.19)
DO29850	XRCC3	chr14	103699416	rs861539	G	A	643.8	0/1	26,23	49	missense_variant	MODERATE	XRCC3	ENSG00000126215	Transcript	ENST00000553264	protein_coding	ENST00000553264.5	c.722C>T	ENSP00000451974.1:p.Thr241Met	1519/3018	722/1041	241/346	T/M	aCg/aTg	rs861539&CM003625	1		-1		SNV	HGNC	HGNC:12830	YES	2	P1	CCDS9984.1	ENSP00000451974	O43542	Q53XC8	UPI000000CC78		Ensembl	G	G		1	tolerated(0.17)	benign(0.19)
DO29970	XRCC3	chr14	103699416	rs861539	G	A	641.8	1/1	0,18	18	missense_variant	MODERATE	XRCC3	ENSG00000126215	Transcript	ENST00000553264	protein_coding	ENST00000553264.5	c.722C>T	ENSP00000451974.1:p.Thr241Met	1519/3018	722/1041	241/346	T/M	aCg/aTg	rs861539&CM003625	1		-1		SNV	HGNC	HGNC:12830	YES	2	P1	CCDS9984.1	ENSP00000451974	O43542	Q53XC8	UPI000000CC78		Ensembl	G	G		1	tolerated(0.17)	benign(0.19)
DO29980	XRCC3	chr14	103699416	rs861539	G	A	243.8	0/1	13,10	23	missense_variant	MODERATE	XRCC3	ENSG00000126215	Transcript	ENST00000553264	protein_coding	ENST00000553264.5	c.722C>T	ENSP00000451974.1:p.Thr241Met	1519/3018	722/1041	241/346	T/M	aCg/aTg	rs861539&CM003625	1		-1		SNV	HGNC	HGNC:12830	YES	2	P1	CCDS9984.1	ENSP00000451974	O43542	Q53XC8	UPI000000CC78		Ensembl	G	G		1	tolerated(0.17)	benign(0.19)
DO30060	XRCC3	chr14	103699416	rs861539	G	A	275.8	0/1	10,10	20	missense_variant	MODERATE	XRCC3	ENSG00000126215	Transcript	ENST00000553264	protein_coding	ENST00000553264.5	c.722C>T	ENSP00000451974.1:p.Thr241Met	1519/3018	722/1041	241/346	T/M	aCg/aTg	rs861539&CM003625	1		-1		SNV	HGNC	HGNC:12830	YES	2	P1	CCDS9984.1	ENSP00000451974	O43542	Q53XC8	UPI000000CC78		Ensembl	G	G		1	tolerated(0.17)	benign(0.19)
DO30090	XRCC3	chr14	103699416	rs861539	G	A	325.8	0/1	8,11	19	missense_variant	MODERATE	XRCC3	ENSG00000126215	Transcript	ENST00000553264	protein_coding	ENST00000553264.5	c.722C>T	ENSP00000451974.1:p.Thr241Met	1519/3018	722/1041	241/346	T/M	aCg/aTg	rs861539&CM003625	1		-1		SNV	HGNC	HGNC:12830	YES	2	P1	CCDS9984.1	ENSP00000451974	O43542	Q53XC8	UPI000000CC78		Ensembl	G	G		1	tolerated(0.17)	benign(0.19)
DO30220	XRCC3	chr14	103699416	rs861539	G	A	967.8	0/1	31,32	63	missense_variant	MODERATE	XRCC3	ENSG00000126215	Transcript	ENST00000553264	protein_coding	ENST00000553264.5	c.722C>T	ENSP00000451974.1:p.Thr241Met	1519/3018	722/1041	241/346	T/M	aCg/aTg	rs861539&CM003625	1		-1		SNV	HGNC	HGNC:12830	YES	2	P1	CCDS9984.1	ENSP00000451974	O43542	Q53XC8	UPI000000CC78		Ensembl	G	G		1	tolerated(0.17)	benign(0.19)
DO30550	XRCC3	chr14	103699416	rs861539	G	A	271.8	0/1	11,10	21	missense_variant	MODERATE	XRCC3	ENSG00000126215	Transcript	ENST00000553264	protein_coding	ENST00000553264.5	c.722C>T	ENSP00000451974.1:p.Thr241Met	1519/3018	722/1041	241/346	T/M	aCg/aTg	rs861539&CM003625	1		-1		SNV	HGNC	HGNC:12830	YES	2	P1	CCDS9984.1	ENSP00000451974	O43542	Q53XC8	UPI000000CC78		Ensembl	G	G		1	tolerated(0.17)	benign(0.19)
DO30750	XRCC3	chr14	103699416	rs861539	G	A	1804.8	1/1	0,52	52	missense_variant	MODERATE	XRCC3	ENSG00000126215	Transcript	ENST00000553264	protein_coding	ENST00000553264.5	c.722C>T	ENSP00000451974.1:p.Thr241Met	1519/3018	722/1041	241/346	T/M	aCg/aTg	rs861539&CM003625	1		-1		SNV	HGNC	HGNC:12830	YES	2	P1	CCDS9984.1	ENSP00000451974	O43542	Q53XC8	UPI000000CC78		Ensembl	G	G		1	tolerated(0.17)	benign(0.19)
DO30970	XRCC3	chr14	103699416	rs861539	G	A	464.8	0/1	19,17	36	missense_variant	MODERATE	XRCC3	ENSG00000126215	Transcript	ENST00000553264	protein_coding	ENST00000553264.5	c.722C>T	ENSP00000451974.1:p.Thr241Met	1519/3018	722/1041	241/346	T/M	aCg/aTg	rs861539&CM003625	1		-1		SNV	HGNC	HGNC:12830	YES	2	P1	CCDS9984.1	ENSP00000451974	O43542	Q53XC8	UPI000000CC78		Ensembl	G	G		1	tolerated(0.17)	benign(0.19)
DO31420	XRCC3	chr14	103699416	rs861539	G	A	118.8	0/1	19,6	25	missense_variant	MODERATE	XRCC3	ENSG00000126215	Transcript	ENST00000553264	protein_coding	ENST00000553264.5	c.722C>T	ENSP00000451974.1:p.Thr241Met	1519/3018	722/1041	241/346	T/M	aCg/aTg	rs861539&CM003625	1		-1		SNV	HGNC	HGNC:12830	YES	2	P1	CCDS9984.1	ENSP00000451974	O43542	Q53XC8	UPI000000CC78		Ensembl	G	G		1	tolerated(0.17)	benign(0.19)
DO31729	XRCC3	chr14	103699416	rs861539	G	A	777.8	0/1	18,26	44	missense_variant	MODERATE	XRCC3	ENSG00000126215	Transcript	ENST00000553264	protein_coding	ENST00000553264.5	c.722C>T	ENSP00000451974.1:p.Thr241Met	1519/3018	722/1041	241/346	T/M	aCg/aTg	rs861539&CM003625	1		-1		SNV	HGNC	HGNC:12830	YES	2	P1	CCDS9984.1	ENSP00000451974	O43542	Q53XC8	UPI000000CC78		Ensembl	G	G		1	tolerated(0.17)	benign(0.19)
DO31769	XRCC3	chr14	103699416	rs861539	G	A	47.8	0/1	10,3	13	missense_variant	MODERATE	XRCC3	ENSG00000126215	Transcript	ENST00000553264	protein_coding	ENST00000553264.5	c.722C>T	ENSP00000451974.1:p.Thr241Met	1519/3018	722/1041	241/346	T/M	aCg/aTg	rs861539&CM003625	1		-1		SNV	HGNC	HGNC:12830	YES	2	P1	CCDS9984.1	ENSP00000451974	O43542	Q53XC8	UPI000000CC78		Ensembl	G	G		1	tolerated(0.17)	benign(0.19)
DO31869	XRCC3	chr14	103699416	rs861539	G	A	1840.8	1/1	0,51	51	missense_variant	MODERATE	XRCC3	ENSG00000126215	Transcript	ENST00000553264	protein_coding	ENST00000553264.5	c.722C>T	ENSP00000451974.1:p.Thr241Met	1519/3018	722/1041	241/346	T/M	aCg/aTg	rs861539&CM003625	1		-1		SNV	HGNC	HGNC:12830	YES	2	P1	CCDS9984.1	ENSP00000451974	O43542	Q53XC8	UPI000000CC78		Ensembl	G	G		1	tolerated(0.17)	benign(0.19)
DO32596	XRCC3	chr14	103699416	rs861539	G	A	1713.8	1/1	0,47	47	missense_variant	MODERATE	XRCC3	ENSG00000126215	Transcript	ENST00000553264	protein_coding	ENST00000553264.5	c.722C>T	ENSP00000451974.1:p.Thr241Met	1519/3018	722/1041	241/346	T/M	aCg/aTg	rs861539&CM003625	1		-1		SNV	HGNC	HGNC:12830	YES	2	P1	CCDS9984.1	ENSP00000451974	O43542	Q53XC8	UPI000000CC78		Ensembl	G	G		1	tolerated(0.17)	benign(0.19)
SHGSOC001	XRCC3	chr14	103699416	rs861539	G	A	858.8	1/1	0,30	30	missense_variant	MODERATE	XRCC3	ENSG00000126215	Transcript	ENST00000553264	protein_coding	ENST00000553264.5	c.722C>T	ENSP00000451974.1:p.Thr241Met	1519/3018	722/1041	241/346	T/M	aCg/aTg	rs861539&CM003625	1		-1		SNV	HGNC	HGNC:12830	YES	2	P1	CCDS9984.1	ENSP00000451974	O43542	Q53XC8	UPI000000CC78		Ensembl	G	G		1	tolerated(0.17)	benign(0.19)
SHGSOC002	XRCC3	chr14	103699416	rs861539	G	A	167.8	0/1	12,10	22	missense_variant	MODERATE	XRCC3	ENSG00000126215	Transcript	ENST00000553264	protein_coding	ENST00000553264.5	c.722C>T	ENSP00000451974.1:p.Thr241Met	1519/3018	722/1041	241/346	T/M	aCg/aTg	rs861539&CM003625	1		-1		SNV	HGNC	HGNC:12830	YES	2	P1	CCDS9984.1	ENSP00000451974	O43542	Q53XC8	UPI000000CC78		Ensembl	G	G		1	tolerated(0.17)	benign(0.19)
SHGSOC003	XRCC3	chr14	103699416	rs861539	G	A	391.8	0/1	10,18	28	missense_variant	MODERATE	XRCC3	ENSG00000126215	Transcript	ENST00000553264	protein_coding	ENST00000553264.5	c.722C>T	ENSP00000451974.1:p.Thr241Met	1519/3018	722/1041	241/346	T/M	aCg/aTg	rs861539&CM003625	1		-1		SNV	HGNC	HGNC:12830	YES	2	P1	CCDS9984.1	ENSP00000451974	O43542	Q53XC8	UPI000000CC78		Ensembl	G	G		1	tolerated(0.17)	benign(0.19)
SHGSOC004	XRCC3	chr14	103699416	rs861539	G	A	284.8	0/1	14,15	29	missense_variant	MODERATE	XRCC3	ENSG00000126215	Transcript	ENST00000553264	protein_coding	ENST00000553264.5	c.722C>T	ENSP00000451974.1:p.Thr241Met	1519/3018	722/1041	241/346	T/M	aCg/aTg	rs861539&CM003625	1		-1		SNV	HGNC	HGNC:12830	YES	2	P1	CCDS9984.1	ENSP00000451974	O43542	Q53XC8	UPI000000CC78		Ensembl	G	G		1	tolerated(0.17)	benign(0.19)
SHGSOC009	XRCC3	chr14	103699416	rs861539	G	A	48.8	0/1	8,5	13	missense_variant	MODERATE	XRCC3	ENSG00000126215	Transcript	ENST00000553264	protein_coding	ENST00000553264.5	c.722C>T	ENSP00000451974.1:p.Thr241Met	1519/3018	722/1041	241/346	T/M	aCg/aTg	rs861539&CM003625	1		-1		SNV	HGNC	HGNC:12830	YES	2	P1	CCDS9984.1	ENSP00000451974	O43542	Q53XC8	UPI000000CC78		Ensembl	G	G		1	tolerated(0.17)	benign(0.19)
SHGSOC011	XRCC3	chr14	103699416	rs861539	G	A	518.8	0/1	13,20	33	missense_variant	MODERATE	XRCC3	ENSG00000126215	Transcript	ENST00000553264	protein_coding	ENST00000553264.5	c.722C>T	ENSP00000451974.1:p.Thr241Met	1519/3018	722/1041	241/346	T/M	aCg/aTg	rs861539&CM003625	1		-1		SNV	HGNC	HGNC:12830	YES	2	P1	CCDS9984.1	ENSP00000451974	O43542	Q53XC8	UPI000000CC78		Ensembl	G	G		1	tolerated(0.17)	benign(0.19)
SHGSOC014	XRCC3	chr14	103699416	rs861539	G	A	1054.8	1/1	0,31	31	missense_variant	MODERATE	XRCC3	ENSG00000126215	Transcript	ENST00000553264	protein_coding	ENST00000553264.5	c.722C>T	ENSP00000451974.1:p.Thr241Met	1519/3018	722/1041	241/346	T/M	aCg/aTg	rs861539&CM003625	1		-1		SNV	HGNC	HGNC:12830	YES	2	P1	CCDS9984.1	ENSP00000451974	O43542	Q53XC8	UPI000000CC78		Ensembl	G	G		1	tolerated(0.17)	benign(0.19)
SHGSOC015	XRCC3	chr14	103699416	rs861539	G	A	276.8	0/1	14,12	26	missense_variant	MODERATE	XRCC3	ENSG00000126215	Transcript	ENST00000553264	protein_coding	ENST00000553264.5	c.722C>T	ENSP00000451974.1:p.Thr241Met	1519/3018	722/1041	241/346	T/M	aCg/aTg	rs861539&CM003625	1		-1		SNV	HGNC	HGNC:12830	YES	2	P1	CCDS9984.1	ENSP00000451974	O43542	Q53XC8	UPI000000CC78		Ensembl	G	G		1	tolerated(0.17)	benign(0.19)
SHGSOC016	XRCC3	chr14	103699416	rs861539	G	A	407.8	0/1	14,14	28	missense_variant	MODERATE	XRCC3	ENSG00000126215	Transcript	ENST00000553264	protein_coding	ENST00000553264.5	c.722C>T	ENSP00000451974.1:p.Thr241Met	1519/3018	722/1041	241/346	T/M	aCg/aTg	rs861539&CM003625	1		-1		SNV	HGNC	HGNC:12830	YES	2	P1	CCDS9984.1	ENSP00000451974	O43542	Q53XC8	UPI000000CC78		Ensembl	G	G		1	tolerated(0.17)	benign(0.19)
SHGSOC020	XRCC3	chr14	103699416	rs861539	G	A	349.8	0/1	11,14	25	missense_variant	MODERATE	XRCC3	ENSG00000126215	Transcript	ENST00000553264	protein_coding	ENST00000553264.5	c.722C>T	ENSP00000451974.1:p.Thr241Met	1519/3018	722/1041	241/346	T/M	aCg/aTg	rs861539&CM003625	1		-1		SNV	HGNC	HGNC:12830	YES	2	P1	CCDS9984.1	ENSP00000451974	O43542	Q53XC8	UPI000000CC78		Ensembl	G	G		1	tolerated(0.17)	benign(0.19)
SHGSOC021	XRCC3	chr14	103699416	rs861539	G	A	892.8	1/1	0,26	26	missense_variant	MODERATE	XRCC3	ENSG00000126215	Transcript	ENST00000553264	protein_coding	ENST00000553264.5	c.722C>T	ENSP00000451974.1:p.Thr241Met	1519/3018	722/1041	241/346	T/M	aCg/aTg	rs861539&CM003625	1		-1		SNV	HGNC	HGNC:12830	YES	2	P1	CCDS9984.1	ENSP00000451974	O43542	Q53XC8	UPI000000CC78		Ensembl	G	G		1	tolerated(0.17)	benign(0.19)
SHGSOC022	XRCC3	chr14	103699416	rs861539	G	A	339.8	0/1	22,15	37	missense_variant	MODERATE	XRCC3	ENSG00000126215	Transcript	ENST00000553264	protein_coding	ENST00000553264.5	c.722C>T	ENSP00000451974.1:p.Thr241Met	1519/3018	722/1041	241/346	T/M	aCg/aTg	rs861539&CM003625	1		-1		SNV	HGNC	HGNC:12830	YES	2	P1	CCDS9984.1	ENSP00000451974	O43542	Q53XC8	UPI000000CC78		Ensembl	G	G		1	tolerated(0.17)	benign(0.19)
SHGSOC023	XRCC3	chr14	103699416	rs861539	G	A	330.8	0/1	20,17	37	missense_variant	MODERATE	XRCC3	ENSG00000126215	Transcript	ENST00000553264	protein_coding	ENST00000553264.5	c.722C>T	ENSP00000451974.1:p.Thr241Met	1519/3018	722/1041	241/346	T/M	aCg/aTg	rs861539&CM003625	1		-1		SNV	HGNC	HGNC:12830	YES	2	P1	CCDS9984.1	ENSP00000451974	O43542	Q53XC8	UPI000000CC78		Ensembl	G	G		1	tolerated(0.17)	benign(0.19)
SHGSOC024	XRCC3	chr14	103699416	rs861539	G	A	597.8	0/1	17,25	42	missense_variant	MODERATE	XRCC3	ENSG00000126215	Transcript	ENST00000553264	protein_coding	ENST00000553264.5	c.722C>T	ENSP00000451974.1:p.Thr241Met	1519/3018	722/1041	241/346	T/M	aCg/aTg	rs861539&CM003625	1		-1		SNV	HGNC	HGNC:12830	YES	2	P1	CCDS9984.1	ENSP00000451974	O43542	Q53XC8	UPI000000CC78		Ensembl	G	G		1	tolerated(0.17)	benign(0.19)
SHGSOC026	XRCC3	chr14	103699416	rs861539	G	A	227.8	0/1	15,11	26	missense_variant	MODERATE	XRCC3	ENSG00000126215	Transcript	ENST00000553264	protein_coding	ENST00000553264.5	c.722C>T	ENSP00000451974.1:p.Thr241Met	1519/3018	722/1041	241/346	T/M	aCg/aTg	rs861539&CM003625	1		-1		SNV	HGNC	HGNC:12830	YES	2	P1	CCDS9984.1	ENSP00000451974	O43542	Q53XC8	UPI000000CC78		Ensembl	G	G		1	tolerated(0.17)	benign(0.19)
SHGSOC030	XRCC3	chr14	103699416	rs861539	G	A	618.8	0/1	9,24	33	missense_variant	MODERATE	XRCC3	ENSG00000126215	Transcript	ENST00000553264	protein_coding	ENST00000553264.5	c.722C>T	ENSP00000451974.1:p.Thr241Met	1519/3018	722/1041	241/346	T/M	aCg/aTg	rs861539&CM003625	1		-1		SNV	HGNC	HGNC:12830	YES	2	P1	CCDS9984.1	ENSP00000451974	O43542	Q53XC8	UPI000000CC78		Ensembl	G	G		1	tolerated(0.17)	benign(0.19)
SHGSOC032	XRCC3	chr14	103699416	rs861539	G	A	723.8	1/1	0,24	24	missense_variant	MODERATE	XRCC3	ENSG00000126215	Transcript	ENST00000553264	protein_coding	ENST00000553264.5	c.722C>T	ENSP00000451974.1:p.Thr241Met	1519/3018	722/1041	241/346	T/M	aCg/aTg	rs861539&CM003625	1		-1		SNV	HGNC	HGNC:12830	YES	2	P1	CCDS9984.1	ENSP00000451974	O43542	Q53XC8	UPI000000CC78		Ensembl	G	G		1	tolerated(0.17)	benign(0.19)
SHGSOC033	XRCC3	chr14	103699416	rs861539	G	A	409.8	0/1	17,17	34	missense_variant	MODERATE	XRCC3	ENSG00000126215	Transcript	ENST00000553264	protein_coding	ENST00000553264.5	c.722C>T	ENSP00000451974.1:p.Thr241Met	1519/3018	722/1041	241/346	T/M	aCg/aTg	rs861539&CM003625	1		-1		SNV	HGNC	HGNC:12830	YES	2	P1	CCDS9984.1	ENSP00000451974	O43542	Q53XC8	UPI000000CC78		Ensembl	G	G		1	tolerated(0.17)	benign(0.19)
SHGSOC034	XRCC3	chr14	103699416	rs861539	G	A	1228.8	1/1	0,41	41	missense_variant	MODERATE	XRCC3	ENSG00000126215	Transcript	ENST00000553264	protein_coding	ENST00000553264.5	c.722C>T	ENSP00000451974.1:p.Thr241Met	1519/3018	722/1041	241/346	T/M	aCg/aTg	rs861539&CM003625	1		-1		SNV	HGNC	HGNC:12830	YES	2	P1	CCDS9984.1	ENSP00000451974	O43542	Q53XC8	UPI000000CC78		Ensembl	G	G		1	tolerated(0.17)	benign(0.19)
SHGSOC037	XRCC3	chr14	103699416	rs861539	G	A	906.8	1/1	0,29	29	missense_variant	MODERATE	XRCC3	ENSG00000126215	Transcript	ENST00000553264	protein_coding	ENST00000553264.5	c.722C>T	ENSP00000451974.1:p.Thr241Met	1519/3018	722/1041	241/346	T/M	aCg/aTg	rs861539&CM003625	1		-1		SNV	HGNC	HGNC:12830	YES	2	P1	CCDS9984.1	ENSP00000451974	O43542	Q53XC8	UPI000000CC78		Ensembl	G	G		1	tolerated(0.17)	benign(0.19)
SHGSOC038	XRCC3	chr14	103699416	rs861539	G	A	681.8	0/1	19,27	46	missense_variant	MODERATE	XRCC3	ENSG00000126215	Transcript	ENST00000553264	protein_coding	ENST00000553264.5	c.722C>T	ENSP00000451974.1:p.Thr241Met	1519/3018	722/1041	241/346	T/M	aCg/aTg	rs861539&CM003625	1		-1		SNV	HGNC	HGNC:12830	YES	2	P1	CCDS9984.1	ENSP00000451974	O43542	Q53XC8	UPI000000CC78		Ensembl	G	G		1	tolerated(0.17)	benign(0.19)
SHGSOC040	XRCC3	chr14	103699416	rs861539	G	A	1523.8	1/1	0,50	50	missense_variant	MODERATE	XRCC3	ENSG00000126215	Transcript	ENST00000553264	protein_coding	ENST00000553264.5	c.722C>T	ENSP00000451974.1:p.Thr241Met	1519/3018	722/1041	241/346	T/M	aCg/aTg	rs861539&CM003625	1		-1		SNV	HGNC	HGNC:12830	YES	2	P1	CCDS9984.1	ENSP00000451974	O43542	Q53XC8	UPI000000CC78		Ensembl	G	G		1	tolerated(0.17)	benign(0.19)
SHGSOC041	XRCC3	chr14	103699416	rs861539	G	A	1241.8	1/1	0,40	40	missense_variant	MODERATE	XRCC3	ENSG00000126215	Transcript	ENST00000553264	protein_coding	ENST00000553264.5	c.722C>T	ENSP00000451974.1:p.Thr241Met	1519/3018	722/1041	241/346	T/M	aCg/aTg	rs861539&CM003625	1		-1		SNV	HGNC	HGNC:12830	YES	2	P1	CCDS9984.1	ENSP00000451974	O43542	Q53XC8	UPI000000CC78		Ensembl	G	G		1	tolerated(0.17)	benign(0.19)
SHGSOC042	XRCC3	chr14	103699416	rs861539	G	A	631.8	1/1	0,26	26	missense_variant	MODERATE	XRCC3	ENSG00000126215	Transcript	ENST00000553264	protein_coding	ENST00000553264.5	c.722C>T	ENSP00000451974.1:p.Thr241Met	1519/3018	722/1041	241/346	T/M	aCg/aTg	rs861539&CM003625	1		-1		SNV	HGNC	HGNC:12830	YES	2	P1	CCDS9984.1	ENSP00000451974	O43542	Q53XC8	UPI000000CC78		Ensembl	G	G		1	tolerated(0.17)	benign(0.19)
SHGSOC043	XRCC3	chr14	103699416	rs861539	G	A	365.8	0/1	25,16	41	missense_variant	MODERATE	XRCC3	ENSG00000126215	Transcript	ENST00000553264	protein_coding	ENST00000553264.5	c.722C>T	ENSP00000451974.1:p.Thr241Met	1519/3018	722/1041	241/346	T/M	aCg/aTg	rs861539&CM003625	1		-1		SNV	HGNC	HGNC:12830	YES	2	P1	CCDS9984.1	ENSP00000451974	O43542	Q53XC8	UPI000000CC78		Ensembl	G	G		1	tolerated(0.17)	benign(0.19)
SHGSOC045	XRCC3	chr14	103699416	rs861539	G	A	647.8	1/1	0,23	23	missense_variant	MODERATE	XRCC3	ENSG00000126215	Transcript	ENST00000553264	protein_coding	ENST00000553264.5	c.722C>T	ENSP00000451974.1:p.Thr241Met	1519/3018	722/1041	241/346	T/M	aCg/aTg	rs861539&CM003625	1		-1		SNV	HGNC	HGNC:12830	YES	2	P1	CCDS9984.1	ENSP00000451974	O43542	Q53XC8	UPI000000CC78		Ensembl	G	G		1	tolerated(0.17)	benign(0.19)
SHGSOC047	XRCC3	chr14	103699416	rs861539	G	A	402.8	0/1	18,17	35	missense_variant	MODERATE	XRCC3	ENSG00000126215	Transcript	ENST00000553264	protein_coding	ENST00000553264.5	c.722C>T	ENSP00000451974.1:p.Thr241Met	1519/3018	722/1041	241/346	T/M	aCg/aTg	rs861539&CM003625	1		-1		SNV	HGNC	HGNC:12830	YES	2	P1	CCDS9984.1	ENSP00000451974	O43542	Q53XC8	UPI000000CC78		Ensembl	G	G		1	tolerated(0.17)	benign(0.19)
SHGSOC053	XRCC3	chr14	103699416	rs861539	G	A	614.8	0/1	12,22	34	missense_variant	MODERATE	XRCC3	ENSG00000126215	Transcript	ENST00000553264	protein_coding	ENST00000553264.5	c.722C>T	ENSP00000451974.1:p.Thr241Met	1519/3018	722/1041	241/346	T/M	aCg/aTg	rs861539&CM003625	1		-1		SNV	HGNC	HGNC:12830	YES	2	P1	CCDS9984.1	ENSP00000451974	O43542	Q53XC8	UPI000000CC78		Ensembl	G	G		1	tolerated(0.17)	benign(0.19)
SHGSOC054	XRCC3	chr14	103699416	rs861539	G	A	255.8	0/1	16,12	28	missense_variant	MODERATE	XRCC3	ENSG00000126215	Transcript	ENST00000553264	protein_coding	ENST00000553264.5	c.722C>T	ENSP00000451974.1:p.Thr241Met	1519/3018	722/1041	241/346	T/M	aCg/aTg	rs861539&CM003625	1		-1		SNV	HGNC	HGNC:12830	YES	2	P1	CCDS9984.1	ENSP00000451974	O43542	Q53XC8	UPI000000CC78		Ensembl	G	G		1	tolerated(0.17)	benign(0.19)
SHGSOC055	XRCC3	chr14	103699416	rs861539	G	A	280.8	0/1	20,13	33	missense_variant	MODERATE	XRCC3	ENSG00000126215	Transcript	ENST00000553264	protein_coding	ENST00000553264.5	c.722C>T	ENSP00000451974.1:p.Thr241Met	1519/3018	722/1041	241/346	T/M	aCg/aTg	rs861539&CM003625	1		-1		SNV	HGNC	HGNC:12830	YES	2	P1	CCDS9984.1	ENSP00000451974	O43542	Q53XC8	UPI000000CC78		Ensembl	G	G		1	tolerated(0.17)	benign(0.19)
SHGSOC057	XRCC3	chr14	103699416	rs861539	G	A	553.8	0/1	7,19	26	missense_variant	MODERATE	XRCC3	ENSG00000126215	Transcript	ENST00000553264	protein_coding	ENST00000553264.5	c.722C>T	ENSP00000451974.1:p.Thr241Met	1519/3018	722/1041	241/346	T/M	aCg/aTg	rs861539&CM003625	1		-1		SNV	HGNC	HGNC:12830	YES	2	P1	CCDS9984.1	ENSP00000451974	O43542	Q53XC8	UPI000000CC78		Ensembl	G	G		1	tolerated(0.17)	benign(0.19)
SHGSOC058	XRCC3	chr14	103699416	rs861539	G	A	406.8	0/1	20,16	36	missense_variant	MODERATE	XRCC3	ENSG00000126215	Transcript	ENST00000553264	protein_coding	ENST00000553264.5	c.722C>T	ENSP00000451974.1:p.Thr241Met	1519/3018	722/1041	241/346	T/M	aCg/aTg	rs861539&CM003625	1		-1		SNV	HGNC	HGNC:12830	YES	2	P1	CCDS9984.1	ENSP00000451974	O43542	Q53XC8	UPI000000CC78		Ensembl	G	G		1	tolerated(0.17)	benign(0.19)
SHGSOC061	XRCC3	chr14	103699416	rs861539	G	A	319.8	0/1	11,14	25	missense_variant	MODERATE	XRCC3	ENSG00000126215	Transcript	ENST00000553264	protein_coding	ENST00000553264.5	c.722C>T	ENSP00000451974.1:p.Thr241Met	1519/3018	722/1041	241/346	T/M	aCg/aTg	rs861539&CM003625	1		-1		SNV	HGNC	HGNC:12830	YES	2	P1	CCDS9984.1	ENSP00000451974	O43542	Q53XC8	UPI000000CC78		Ensembl	G	G		1	tolerated(0.17)	benign(0.19)
SHGSOC062	XRCC3	chr14	103699416	rs861539	G	A	1189.8	1/1	0,38	38	missense_variant	MODERATE	XRCC3	ENSG00000126215	Transcript	ENST00000553264	protein_coding	ENST00000553264.5	c.722C>T	ENSP00000451974.1:p.Thr241Met	1519/3018	722/1041	241/346	T/M	aCg/aTg	rs861539&CM003625	1		-1		SNV	HGNC	HGNC:12830	YES	2	P1	CCDS9984.1	ENSP00000451974	O43542	Q53XC8	UPI000000CC78		Ensembl	G	G		1	tolerated(0.17)	benign(0.19)
SHGSOC065	XRCC3	chr14	103699416	rs861539	G	A	272.8	0/1	18,16	34	missense_variant	MODERATE	XRCC3	ENSG00000126215	Transcript	ENST00000553264	protein_coding	ENST00000553264.5	c.722C>T	ENSP00000451974.1:p.Thr241Met	1519/3018	722/1041	241/346	T/M	aCg/aTg	rs861539&CM003625	1		-1		SNV	HGNC	HGNC:12830	YES	2	P1	CCDS9984.1	ENSP00000451974	O43542	Q53XC8	UPI000000CC78		Ensembl	G	G		1	tolerated(0.17)	benign(0.19)
SHGSOC071	XRCC3	chr14	103699416	rs861539	G	A	526.8	0/1	13,20	33	missense_variant	MODERATE	XRCC3	ENSG00000126215	Transcript	ENST00000553264	protein_coding	ENST00000553264.5	c.722C>T	ENSP00000451974.1:p.Thr241Met	1519/3018	722/1041	241/346	T/M	aCg/aTg	rs861539&CM003625	1		-1		SNV	HGNC	HGNC:12830	YES	2	P1	CCDS9984.1	ENSP00000451974	O43542	Q53XC8	UPI000000CC78		Ensembl	G	G		1	tolerated(0.17)	benign(0.19)
SHGSOC072	XRCC3	chr14	103699416	rs861539	G	A	326.8	0/1	20,13	33	missense_variant	MODERATE	XRCC3	ENSG00000126215	Transcript	ENST00000553264	protein_coding	ENST00000553264.5	c.722C>T	ENSP00000451974.1:p.Thr241Met	1519/3018	722/1041	241/346	T/M	aCg/aTg	rs861539&CM003625	1		-1		SNV	HGNC	HGNC:12830	YES	2	P1	CCDS9984.1	ENSP00000451974	O43542	Q53XC8	UPI000000CC78		Ensembl	G	G		1	tolerated(0.17)	benign(0.19)
SHGSOC074	XRCC3	chr14	103699416	rs861539	G	A	394.8	0/1	25,17	42	missense_variant	MODERATE	XRCC3	ENSG00000126215	Transcript	ENST00000553264	protein_coding	ENST00000553264.5	c.722C>T	ENSP00000451974.1:p.Thr241Met	1519/3018	722/1041	241/346	T/M	aCg/aTg	rs861539&CM003625	1		-1		SNV	HGNC	HGNC:12830	YES	2	P1	CCDS9984.1	ENSP00000451974	O43542	Q53XC8	UPI000000CC78		Ensembl	G	G		1	tolerated(0.17)	benign(0.19)
SHGSOC076	XRCC3	chr14	103699416	rs861539	G	A	982.8	1/1	0,32	32	missense_variant	MODERATE	XRCC3	ENSG00000126215	Transcript	ENST00000553264	protein_coding	ENST00000553264.5	c.722C>T	ENSP00000451974.1:p.Thr241Met	1519/3018	722/1041	241/346	T/M	aCg/aTg	rs861539&CM003625	1		-1		SNV	HGNC	HGNC:12830	YES	2	P1	CCDS9984.1	ENSP00000451974	O43542	Q53XC8	UPI000000CC78		Ensembl	G	G		1	tolerated(0.17)	benign(0.19)
SHGSOC078	XRCC3	chr14	103699416	rs861539	G	A	350.8	0/1	11,14	25	missense_variant	MODERATE	XRCC3	ENSG00000126215	Transcript	ENST00000553264	protein_coding	ENST00000553264.5	c.722C>T	ENSP00000451974.1:p.Thr241Met	1519/3018	722/1041	241/346	T/M	aCg/aTg	rs861539&CM003625	1		-1		SNV	HGNC	HGNC:12830	YES	2	P1	CCDS9984.1	ENSP00000451974	O43542	Q53XC8	UPI000000CC78		Ensembl	G	G		1	tolerated(0.17)	benign(0.19)
SHGSOC081	XRCC3	chr14	103699416	rs861539	G	A	563.8	0/1	26,21	47	missense_variant	MODERATE	XRCC3	ENSG00000126215	Transcript	ENST00000553264	protein_coding	ENST00000553264.5	c.722C>T	ENSP00000451974.1:p.Thr241Met	1519/3018	722/1041	241/346	T/M	aCg/aTg	rs861539&CM003625	1		-1		SNV	HGNC	HGNC:12830	YES	2	P1	CCDS9984.1	ENSP00000451974	O43542	Q53XC8	UPI000000CC78		Ensembl	G	G		1	tolerated(0.17)	benign(0.19)
SHGSOC082	XRCC3	chr14	103699416	rs861539	G	A	1981.8	1/1	0,61	61	missense_variant	MODERATE	XRCC3	ENSG00000126215	Transcript	ENST00000553264	protein_coding	ENST00000553264.5	c.722C>T	ENSP00000451974.1:p.Thr241Met	1519/3018	722/1041	241/346	T/M	aCg/aTg	rs861539&CM003625	1		-1		SNV	HGNC	HGNC:12830	YES	2	P1	CCDS9984.1	ENSP00000451974	O43542	Q53XC8	UPI000000CC78		Ensembl	G	G		1	tolerated(0.17)	benign(0.19)
SHGSOC085	XRCC3	chr14	103699416	rs861539	G	A	5216.8	1/1	1154	155	missense_variant	MODERATE	XRCC3	ENSG00000126215	Transcript	ENST00000553264	protein_coding	ENST00000553264.5	c.722C>T	ENSP00000451974.1:p.Thr241Met	1519/3018	722/1041	241/346	T/M	aCg/aTg	rs861539&CM003625	1		-1		SNV	HGNC	HGNC:12830	YES	2	P1	CCDS9984.1	ENSP00000451974	O43542	Q53XC8	UPI000000CC78		Ensembl	G	G		1	tolerated(0.17)	benign(0.19)
SHGSOC089	XRCC3	chr14	103699416	rs861539	G	A	1368.8	1/1	0,44	44	missense_variant	MODERATE	XRCC3	ENSG00000126215	Transcript	ENST00000553264	protein_coding	ENST00000553264.5	c.722C>T	ENSP00000451974.1:p.Thr241Met	1519/3018	722/1041	241/346	T/M	aCg/aTg	rs861539&CM003625	1		-1		SNV	HGNC	HGNC:12830	YES	2	P1	CCDS9984.1	ENSP00000451974	O43542	Q53XC8	UPI000000CC78		Ensembl	G	G		1	tolerated(0.17)	benign(0.19)
SHGSOC090	XRCC3	chr14	103699416	rs861539	G	A	1356.8	1/1	0,42	42	missense_variant	MODERATE	XRCC3	ENSG00000126215	Transcript	ENST00000553264	protein_coding	ENST00000553264.5	c.722C>T	ENSP00000451974.1:p.Thr241Met	1519/3018	722/1041	241/346	T/M	aCg/aTg	rs861539&CM003625	1		-1		SNV	HGNC	HGNC:12830	YES	2	P1	CCDS9984.1	ENSP00000451974	O43542	Q53XC8	UPI000000CC78		Ensembl	G	G		1	tolerated(0.17)	benign(0.19)
SHGSOC093	XRCC3	chr14	103699416	rs861539	G	A	368.8	0/1	18,15	33	missense_variant	MODERATE	XRCC3	ENSG00000126215	Transcript	ENST00000553264	protein_coding	ENST00000553264.5	c.722C>T	ENSP00000451974.1:p.Thr241Met	1519/3018	722/1041	241/346	T/M	aCg/aTg	rs861539&CM003625	1		-1		SNV	HGNC	HGNC:12830	YES	2	P1	CCDS9984.1	ENSP00000451974	O43542	Q53XC8	UPI000000CC78		Ensembl	G	G		1	tolerated(0.17)	benign(0.19)
SHGSOC100	XRCC3	chr14	103699416	rs861539	G	A	1141.8	1/1	0,38	38	missense_variant	MODERATE	XRCC3	ENSG00000126215	Transcript	ENST00000553264	protein_coding	ENST00000553264.5	c.722C>T	ENSP00000451974.1:p.Thr241Met	1519/3018	722/1041	241/346	T/M	aCg/aTg	rs861539&CM003625	1		-1		SNV	HGNC	HGNC:12830	YES	2	P1	CCDS9984.1	ENSP00000451974	O43542	Q53XC8	UPI000000CC78		Ensembl	G	G		1	tolerated(0.17)	benign(0.19)
[truncated: 34 more columns]

## Sheet: Somatic SNVs
#Supplementary Table 6 - Somatic SNVs and indels at non-BRCA HR genes. Variants filtered to include only those likely to be disruptive to the function of the gene.
Hugo_Symbol	Tumor_Sample_Barcode	Chromosome	Start_Position	End_Position	Reference_Allele	Tumor_Seq_Allele1	Tumor_Seq_Allele2	dbSNP_RS	HGVSc	HGVSp	Consequence	t_alt_count	t_depth	AAF	CLIN_SIG	IMPACT	CADD
XRCC3	AOCS_111	chr14	103699527	103699527	C	C	T	rs756095186	c.611G>A	p.Arg204Gln	missense_variant	7	39	0.179487	NA	MODERATE	23.1
TOP3B	AOCS_131	chr22	21959219	21959219	C	C	G		c.1818G>C	p.Leu606Phe	missense_variant	8	44	0.181818	NA	MODERATE	22.6
RAD54B	SHGSOC015	chr8	94380304	94380304	G	G	C	novel	c.2088C>G	p.Ile696Met	missense_variant	9	61	0.147541	NA	MODERATE	20.5
NBN	SHGSOC031	chr8	89937039	89937039	C	C	T	novel	c.2221G>A	p.Asp741Asn	missense_variant	20	64	0.3125		MODERATE	26.9
RAD54L	SHGSOC037	chr1	46261279	46261279	G	G	A	rs141226335	c.785G>A	p.Arg262His	missense_variant	16	70	0.228571	NA	MODERATE	21.3
TOP3B	SHGSOC042	chr22	21957256	21957256	G	G	A	rs774350862	c.2447C>T	p.Ala816Val	missense_variant	9	42	0.214286	NA	MODERATE	28.2
TOP3B	SHGSOC044	chr22	21957404	21957404	A	A	G	rs140264686	c.2299T>C	p.Ser767Pro	missense_variant	9	40	0.225	NA	MODERATE	22.8
