# Supplementary material for: Structural Variants at the BRCA1/2 Loci are a Common Source of Homologous Repair Deficiency in High-grade Serous Ovarian Carcinoma
Source: Oxford University Press journal article supplement (doi:10.1158/1078-0432.ccr-20-4068), 2021-03-19
Supplement: 10780432ccr204068-sup-253859_2_supp_6963239_qpgv49.xlsx [file 10780432ccr204068-sup-253859_2_supp_6963239_qpgv49.xlsx]

## Sheet: Sheet1
#Supplementary Table 5 - Genes in KEGG HR pathway
Chromosome	Start	End	Gene
chr1	27891524	27914746	RPA2
chr1	46246461	46278480	RAD54L
chr5	132556019	132646349	RAD50
chr7	141738334	141787922	SSBP1
chr7	152644776	152676141	XRCC2
chr7	44114681	44124358	POLD2
chr7	7636518	7718607	RPA3
chr8	89933336	90003228	NBN
chr8	94371960	94475115	RAD54B
chr11	65857126	65867653	MUS81
chr11	67350772	67356972	POLD4
chr11	74493851	74669117	POLD3
chr12	912077	990053	RAD52
chr14	103697609	103715504	XRCC3
chr15	40694774	40732340	RAD51
chr15	90717346	90816166	BLM
chr17	18271428	18315007	TOP3A
chr17	1829702	1900082	RPA1
chr17	50373220	50381483	EME1
chr17	58692573	58735611	RAD51C
chr19	50384204	50418018	POLD1
chr22	21957025	21982816	TOP3B
chrX	96883908	96885467	RPA4
