# Supplementary material for: Structural Variants at the BRCA1/2 Loci are a Common Source of Homologous Repair Deficiency in High-grade Serous Ovarian Carcinoma
Source: Oxford University Press journal article supplement (doi:10.1158/1078-0432.ccr-20-4068), 2021-03-19
Supplement: 10780432ccr204068-sup-253859_2_supp_6963240_qpg849.xlsx [file 10780432ccr204068-sup-253859_2_supp_6963240_qpg849.xlsx]

## Sheet: DE_HRD_genes
#Supplementary Table 4 - Differentially expressed genes between HRP and HRD samples. DE calculated using DESeq2 adjusted for cellularity and cohort. Comparison direction: HRP vs HRD.
Gene	baseMean	log2FoldChange	lfcSE	pvalue	adj.pvalue
ENSG00000224089	1.7821	-29.4024	2.95524	9.3548e-24	6.65169e-20
ENSG00000018625	733.302	3.61629	0.48405	1.55688e-16	7.67972e-13
ENSG00000131242	5886.54	1.67924	0.211536	2.67529e-16	1.05572e-12
ENSG00000143839	363.591	-4.041	0.63177	2.83754e-13	9.33123e-10
ENSG00000158815	273.377	3.34353	0.537091	1.04052e-12	2.89951e-09
ENSG00000164007	215.563	3.36984	0.543276	1.17562e-12	2.89951e-09
ENSG00000267978	159.601	4.66448	0.760387	1.43545e-12	3.14699e-09
ENSG00000198883	123.447	3.69324	0.610855	2.66018e-12	5.24879e-09
ENSG00000125384	531.388	-2.16866	0.350039	1.86277e-11	2.82726e-08
ENSG00000126895	267.639	2.44775	0.414649	4.63553e-11	6.53311e-08
ENSG00000134827	44.4557	-3.43234	0.645681	2.11785e-10	2.61171e-07
ENSG00000234068	275.811	4.57483	0.878896	2.53103e-10	2.93763e-07
ENSG00000266524	95.9752	3.26295	0.629087	4.99572e-10	5.47614e-07
ENSG00000007933	245.601	-2.40621	0.438671	5.79445e-10	5.71651e-07
ENSG00000186281	804.892	2.32585	0.42573	8.23223e-10	7.73477e-07
ENSG00000198914	135.152	2.93108	0.570269	1.04329e-09	7.94371e-07
ENSG00000182759	84.5681	2.61471	0.496106	1.04676e-09	7.94371e-07
ENSG00000112195	79.3513	2.05834	0.370114	9.99204e-10	7.94371e-07
ENSG00000122733	36.9457	1.95085	0.34819	1.00788e-09	7.94371e-07
ENSG00000274211	1750.79	1.04021	0.214229	1.57437e-09	1.15052e-06
ENSG00000179348	453.13	2.10732	0.389285	1.93295e-09	1.36211e-06
ENSG00000204347	58.9316	4.11076	0.866466	2.69985e-09	1.83692e-06
ENSG00000139985	46.5742	1.86139	0.345579	3.46556e-09	2.2793e-06
ENSG00000149948	4130.07	2.19957	0.419491	3.64225e-09	2.31824e-06
ENSG00000046774	86.5172	5.08877	1.14165	5.63842e-09	3.17862e-06
ENSG00000221867	67.5765	5.10532	1.14357	5.4183e-09	3.17862e-06
ENSG00000197172	74.4054	4.84516	1.07369	5.32103e-09	3.17862e-06
ENSG00000122133	1151.72	-2.62071	0.530584	5.57328e-09	3.17862e-06
ENSG00000114113	53.2406	2.71728	0.572403	1.11911e-08	6.13366e-06
ENSG00000206557	247.537	2.08576	0.415464	1.36324e-08	7.07845e-06
ENSG00000109832	272.36	2.00649	0.399789	1.58198e-08	8.00362e-06
ENSG00000165071	115.16	-1.4326	0.292283	1.6749e-08	8.26185e-06
ENSG00000138336	729.766	1.05046	0.24874	3.25264e-08	1.45859e-05
ENSG00000101210	397.32	-2.91202	0.657879	3.2108e-08	1.45859e-05
ENSG00000156687	39.359	3.06412	0.700611	3.18139e-08	1.45859e-05
ENSG00000162981	1446.58	1.80446	0.369785	3.45355e-08	1.51427e-05
ENSG00000106633	73.818	1.83725	0.38119	4.35429e-08	1.75336e-05
ENSG00000167165	36.6206	3.69778	0.896008	4.50989e-08	1.75961e-05
ENSG00000161249	14503	1.3034	0.289565	4.54818e-08	1.75961e-05
ENSG00000168269	32.6264	-2.67204	0.605532	5.21888e-08	1.98026e-05
ENSG00000004776	2475.13	1.85545	0.390776	5.72832e-08	2.13256e-05
ENSG00000187772	82.276	2.26568	0.495713	6.38138e-08	2.33168e-05
ENSG00000174498	76.6833	1.81334	0.392416	9.39168e-08	3.19495e-05
ENSG00000164197	360.896	1.28699	0.303209	1.12059e-07	3.62464e-05
ENSG00000136695	17.3332	-2.51483	0.586921	1.15695e-07	3.68191e-05
ENSG00000170498	52.7076	-2.19283	0.493601	1.19064e-07	3.72898e-05
ENSG00000163377	20.2632	2.52793	0.596695	1.34558e-07	4.1484e-05
ENSG00000197584	296.948	1.75982	0.389776	1.37043e-07	4.16001e-05
ENSG00000186562	6.45592	-7.37236	2.59678	1.58489e-07	4.59876e-05
ENSG00000170485	3201.25	-1.38508	0.325856	1.66467e-07	4.69224e-05
ENSG00000196091	65.511	-3.09253	0.792442	1.79027e-07	4.90198e-05
ENSG00000105509	58.1246	-2.46499	0.589001	1.81362e-07	4.90198e-05
ENSG00000277639	2007.29	-1.47567	0.343201	1.88373e-07	4.99236e-05
ENSG00000101198	332.553	2.20808	0.515386	2.03188e-07	5.20662e-05
ENSG00000164061	397.428	1.18854	0.301781	2.19459e-07	5.55146e-05
ENSG00000198643	184.932	-2.41536	0.582011	2.23559e-07	5.5836e-05
ENSG00000162344	76.0061	2.80374	0.712323	2.37728e-07	5.86326e-05
ENSG00000133980	32.2308	1.86819	0.430148	2.44789e-07	5.89016e-05
ENSG00000110680	686.453	-4.22346	1.21576	2.42412e-07	5.89016e-05
ENSG00000176887	1242.23	2.11528	0.497684	2.62475e-07	6.23964e-05
ENSG00000187801	222.039	1.166	0.303804	2.8836e-07	6.77337e-05
ENSG00000111405	165.662	-1.92793	0.451012	2.96504e-07	6.88272e-05
ENSG00000187416	18.437	2.62605	0.668838	3.23922e-07	7.43176e-05
ENSG00000163739	918.376	-1.84409	0.437514	3.73568e-07	8.47227e-05
ENSG00000135437	680.799	-1.35686	0.341192	3.87521e-07	8.59121e-05
ENSG00000112299	206.3	-1.26333	0.329091	4.38042e-07	9.49781e-05
ENSG00000267041	1168.13	1.0403	0.290451	4.57325e-07	9.70266e-05
ENSG00000160505	13.6905	2.61897	0.689463	4.83903e-07	0.000101573
ENSG00000188305	44.5533	-1.18892	0.320019	5.01915e-07	0.000104245
ENSG00000255501	8.22381	3.60615	1.07475	5.27867e-07	0.000107375
ENSG00000143452	41.5984	2.00922	0.495109	5.43876e-07	0.000108782
ENSG00000242715	366.955	1.31581	0.34334	5.4581e-07	0.000108782
ENSG00000171102	204.189	-2.32063	0.601135	6.4387e-07	0.000124551
ENSG00000254979	69.8362	-1.60857	0.401858	6.40581e-07	0.000124551
ENSG00000106113	26.1823	1.62335	0.410671	7.57134e-07	0.000139617
ENSG00000184478	19.0529	2.92818	0.842028	7.7207e-07	0.000141053
ENSG00000140287	54.5313	2.02105	0.514426	7.83888e-07	0.000141898
ENSG00000084628	64.8929	1.45127	0.381351	8.82641e-07	0.000155228
ENSG00000181449	278.522	-2.45143	0.667338	8.88993e-07	0.000155228
ENSG00000176884	38.4565	-1.61557	0.416333	9.2938e-07	0.000160144
ENSG00000130294	7389.63	1.78046	0.460739	1.06204e-06	0.000176093
ENSG00000117016	305.759	1.12732	0.330136	1.17744e-06	0.0001936
ENSG00000137285	1285.33	2.11906	0.571153	1.27859e-06	0.000208495
ENSG00000188886	50.8866	1.32999	0.371464	1.29991e-06	0.000210235
ENSG00000125931	52.2057	-1.76161	0.466548	1.35392e-06	0.000213713
ENSG00000163132	778.505	1.42576	0.39152	1.37174e-06	0.000214808
ENSG00000136244	205.552	-1.8025	0.480436	1.44359e-06	0.000223056
ENSG00000145526	278.903	1.93319	0.521304	1.53281e-06	0.000230869
ENSG00000138449	14616.2	-1.35549	0.386394	1.7428e-06	0.000252847
ENSG00000183631	8.22132	-2.34619	0.677892	1.77602e-06	0.000254378
ENSG00000188051	513.483	1.47417	0.411907	1.81498e-06	0.000255795
ENSG00000070985	135.938	1.43182	0.404988	1.90348e-06	0.000261472
ENSG00000204248	902.095	1.61981	0.448884	2.00274e-06	0.000267708
ENSG00000175592	195.997	-1.07355	0.333446	2.02538e-06	0.000268206
ENSG00000171401	169.007	2.0338	0.574234	2.14444e-06	0.000280212
ENSG00000139679	2217.33	-1.19524	0.362439	2.19416e-06	0.000283846
ENSG00000187144	295.162	-2.19066	0.63495	2.23859e-06	0.000286815
ENSG00000007350	465.691	2.50863	0.778333	2.46722e-06	0.000310068
ENSG00000187048	89.7558	-1.54076	0.440803	2.52325e-06	0.000315102
ENSG00000143469	250.494	1.58794	0.454532	2.65644e-06	0.000325555
ENSG00000187135	77.0796	2.59827	0.831873	2.72332e-06	0.00033169
ENSG00000155816	68.2094	1.4201	0.41785	2.76766e-06	0.000335022
ENSG00000112280	1944.78	1.99245	0.579192	2.84574e-06	0.000342373
ENSG00000148735	3764.67	-1.8597	0.535784	2.90205e-06	0.000342877
ENSG00000165181	17.3161	-1.52095	0.44252	2.88979e-06	0.000342877
ENSG00000159763	26.7528	-2.58503	0.835141	2.94168e-06	0.000345489
ENSG00000048540	1755.36	1.92194	0.557651	2.96548e-06	0.000346225
ENSG00000132026	82.8008	1.74537	0.511197	3.44253e-06	0.00038814
ENSG00000145832	164.996	-1.68066	0.498858	3.83373e-06	0.000422588
ENSG00000206075	132.498	1.45304	0.440461	3.85904e-06	0.000423015
ENSG00000189064	427.145	3.30503	1.32572	4.01473e-06	0.000432867
ENSG00000102287	3502.17	-1.4679	0.446362	4.04941e-06	0.000434233
ENSG00000156689	135.33	-2.21334	0.699692	4.14365e-06	0.000441937
ENSG00000159173	793.371	1.60837	0.483998	4.19273e-06	0.000444767
ENSG00000161055	1825.51	-2.14847	0.675681	4.33088e-06	0.000456966
ENSG00000268447	77.5774	-2.74043	0.980607	4.41484e-06	0.000463347
ENSG00000124440	2243.62	1.3872	0.433105	4.56348e-06	0.000476413
ENSG00000023445	2243.78	-1.07202	0.360193	4.82136e-06	0.000498064
ENSG00000164076	22.4122	1.64234	0.503282	4.93212e-06	0.00050449
ENSG00000126752	193.012	-2.71136	0.984457	4.9347e-06	0.00050449
ENSG00000149926	87.1657	-1.00075	0.343554	5.32212e-06	0.000533049
ENSG00000103449	307.577	1.74891	0.542751	5.44386e-06	0.000539763
ENSG00000130595	218.752	1.8366	0.574793	5.59053e-06	0.000547416
ENSG00000166741	6974.03	-1.37149	0.440677	5.74708e-06	0.000556121
ENSG00000166743	93.2622	-1.47051	0.465889	5.78808e-06	0.000557096
ENSG00000205364	704.66	-1.79773	0.565815	5.9372e-06	0.000568674
ENSG00000110375	175.597	1.62065	0.509673	6.0127e-06	0.000569294
ENSG00000115474	51.9907	1.92006	0.613222	6.07761e-06	0.000571035
ENSG00000170439	1299.03	-1.00876	0.353242	6.62527e-06	0.000616619
ENSG00000259207	1002.07	-1.46467	0.472509	6.67804e-06	0.000618612
ENSG00000133321	4675.42	-1.2165	0.411098	6.87589e-06	0.000631015
ENSG00000175497	199.8	1.31439	0.436124	6.95059e-06	0.000633957
ENSG00000086288	55.8018	-1.42166	0.464305	7.05465e-06	0.00063851
ENSG00000213931	16.2133	1.94355	0.638294	7.15783e-06	0.000644891
ENSG00000185215	32043.4	-1.09198	0.381491	7.41889e-06	0.000659379
ENSG00000136928	377.737	-1.77361	0.576655	7.53578e-06	0.000663788
ENSG00000187957	74.6302	1.56926	0.512644	7.89298e-06	0.000692162
ENSG00000111452	510.893	1.34351	0.452914	8.30566e-06	0.000721934
ENSG00000168878	156.031	-1.37193	0.462147	8.56332e-06	0.00073783
ENSG00000240445	91.6426	1.08331	0.384747	8.56168e-06	0.00073783
ENSG00000007402	542.792	1.00325	0.362089	8.91807e-06	0.000751976
ENSG00000137441	139.774	-2.0088	0.689397	8.77609e-06	0.000751976
ENSG00000167771	1054.6	1.0645	0.380665	8.86862e-06	0.000751976
ENSG00000178919	131.74	-2.3876	0.900126	8.96499e-06	0.000752715
ENSG00000128040	29.1024	-1.5936	0.535057	9.68605e-06	0.00079301
ENSG00000158525	29.6967	-1.48005	0.503875	1.02581e-05	0.000826132
ENSG00000119457	31.2616	-1.28949	0.45206	1.06499e-05	0.000850744
ENSG00000204379	38.7948	3.17537	1.6905	1.07783e-05	0.000857523
ENSG00000141431	264.823	1.6548	0.56587	1.09624e-05	0.000868673
ENSG00000163623	342.204	1.79525	0.622003	1.12165e-05	0.000881725
ENSG00000181433	44.5886	-2.12296	0.790304	1.18768e-05	0.000918531
ENSG00000125657	67.783	-1.03672	0.384016	1.18921e-05	0.000918531
ENSG00000144476	1804.97	1.08231	0.398892	1.20503e-05	0.000922536
ENSG00000130234	99.5295	-1.12443	0.414131	1.27118e-05	0.000957317
ENSG00000044012	3.97347	-3.0654	1.67617	1.29266e-05	0.000966114
ENSG00000130876	99.8483	1.62381	0.576457	1.40376e-05	0.00102584
ENSG00000175664	4.2438	2.2476	0.901637	1.42276e-05	0.00103207
ENSG00000113211	371.283	1.38435	0.499157	1.46154e-05	0.00104484
ENSG00000256463	17.9491	2.053	0.79257	1.54209e-05	0.0010945
ENSG00000159231	644.801	-1.3646	0.497883	1.56832e-05	0.00110516
ENSG00000187479	777.107	-1.10226	0.418304	1.59795e-05	0.00112203
ENSG00000177707	2801.48	1.06812	0.407418	1.60416e-05	0.0011224
ENSG00000254827	141.658	-1.14705	0.435356	1.68902e-05	0.00116933
ENSG00000204140	78.477	-1.68381	0.619602	1.70739e-05	0.00117408
ENSG00000204542	86.1234	-1.65752	0.609052	1.71372e-05	0.00117408
ENSG00000226929	0.96572	3.91646	5.5587	1.8301e-05	0.00122822
ENSG00000183423	33.1247	-1.26069	0.475609	1.82937e-05	0.00122822
ENSG00000188487	27.983	-1.5362	0.572482	1.91926e-05	0.00127077
ENSG00000166558	33.5911	1.6782	0.635557	2.01434e-05	0.00132483
ENSG00000258986	72.29	-1.90596	0.752763	2.03952e-05	0.00133251
ENSG00000103569	564.731	-1.25985	0.482643	2.04862e-05	0.00133404
ENSG00000164078	1263.27	-1.07542	0.422564	2.07784e-05	0.00134419
ENSG00000117148	238.028	1.9107	0.759083	2.08472e-05	0.00134424
ENSG00000148344	826.162	-1.15275	0.449231	2.10094e-05	0.0013459
ENSG00000163734	179.902	-1.15989	0.452826	2.14614e-05	0.00136235
ENSG00000187922	183.583	1.37153	0.523341	2.15371e-05	0.00136235
ENSG00000140274	12.8797	1.62803	0.623308	2.19592e-05	0.00137548
ENSG00000151365	163.6	-1.35122	0.518961	2.22705e-05	0.00137913
ENSG00000170835	1223.52	-1.37984	0.528517	2.21775e-05	0.00137913
ENSG00000257017	19775.6	-1.80704	0.715375	2.2879e-05	0.00140194
ENSG00000203697	283.944	-1.3839	0.534618	2.35011e-05	0.0014356
ENSG00000106541	1502.33	-1.75042	0.712966	2.76574e-05	0.00161931
ENSG00000284505	85.414	-1.22645	0.492057	2.78203e-05	0.00162403
ENSG00000183625	20.6939	-1.17246	0.47355	2.80453e-05	0.00162596
ENSG00000102387	76.968	1.53841	0.611767	2.80812e-05	0.00162596
ENSG00000205683	351.82	-1.12872	0.458935	2.84871e-05	0.00164351
ENSG00000186838	46.1545	1.58824	0.63784	2.90284e-05	0.00166725
ENSG00000146352	7.64374	2.36343	1.23583	2.90677e-05	0.00166725
ENSG00000187997	32.6746	-1.11087	0.454099	2.92643e-05	0.00166907
ENSG00000101951	14.325	2.07163	0.957357	3.07991e-05	0.00173133
ENSG00000136014	148.592	1.04019	0.432967	3.21546e-05	0.00180239
ENSG00000119147	526.186	1.37759	0.561822	3.30098e-05	0.00183469
ENSG00000135902	12.4372	1.58007	0.653045	3.38485e-05	0.00187603
ENSG00000148798	271.524	1.35286	0.558199	3.53059e-05	0.00188867
ENSG00000183783	12.6243	-1.65096	0.694428	3.51094e-05	0.00188867
ENSG00000188993	53.5655	-1.20775	0.502372	3.53211e-05	0.00188867
ENSG00000102539	7.43143	1.13437	0.477492	3.68404e-05	0.00194879
ENSG00000269307	18.4357	1.59704	0.680466	3.89087e-05	0.00204402
ENSG00000122756	481.564	1.49912	0.631918	3.9016e-05	0.00204402
ENSG00000174611	71.9437	1.20453	0.510164	3.98154e-05	0.00207388
ENSG00000135333	177.422	1.3909	0.592512	4.25527e-05	0.00216953
ENSG00000125998	8.4181	1.48452	0.637943	4.33849e-05	0.00220626
ENSG00000250423	193.464	-1.2051	0.51889	4.4369e-05	0.00224473
ENSG00000162892	36.4683	-1.0651	0.463796	4.54777e-05	0.00228908
ENSG00000175928	747.133	1.19219	0.518891	4.73697e-05	0.00236023
ENSG00000204511	20.1409	1.7055	0.79211	5.08144e-05	0.00249408
ENSG00000161509	107.077	1.07518	0.476296	5.14544e-05	0.00250678
ENSG00000153002	62.8345	-1.31512	0.582316	5.32934e-05	0.00256471
ENSG00000248933	11.6738	-2.04251	2.49512	5.39628e-05	0.00257806
ENSG00000070808	60.1345	1.23622	0.55614	5.8499e-05	0.0027482
ENSG00000081041	437.091	-1.03106	0.467575	6.01103e-05	0.00279726
ENSG00000163888	120.851	-1.14634	0.523048	6.32944e-05	0.00289638
ENSG00000163520	2993.38	1.00088	0.460697	6.67239e-05	0.00300577
ENSG00000170516	4.17277	1.85083	1.00094	6.77503e-05	0.00303814
ENSG00000165323	275.485	-1.24212	0.574753	6.87537e-05	0.00306918
ENSG00000165556	52.7254	1.63661	0.814314	7.11866e-05	0.00314283
ENSG00000126890	101.267	2.0886	1.94047	7.17588e-05	0.00314383
ENSG00000123584	80.2193	1.71113	2.52985	7.20632e-05	0.00314383
ENSG00000178372	520.33	-1.68031	0.864589	7.52945e-05	0.00323668
ENSG00000182111	114.87	1.13446	0.533978	7.65308e-05	0.00327555
ENSG00000183346	84.5675	1.12733	0.532787	7.84554e-05	0.00334342
ENSG00000161905	392.747	-1.51295	0.752819	8.20625e-05	0.00345121
ENSG00000198075	264.881	1.05777	0.507421	8.66221e-05	0.00354593
ENSG00000175868	296.81	-1.57339	0.80955	8.65901e-05	0.00354593
ENSG00000196132	188.735	1.123	0.54203	8.88921e-05	0.00357703
ENSG00000164690	228.494	-1.53903	0.788334	8.88552e-05	0.00357703
ENSG00000172927	232.305	-1.12428	0.544213	9.03742e-05	0.00361034
ENSG00000056291	20.8496	1.04442	0.508268	9.49218e-05	0.00373833
ENSG00000164530	67.0111	1.28567	0.635254	9.5421e-05	0.0037505
ENSG00000198842	113.065	-1.44168	0.740716	0.000100063	0.00387888
ENSG00000179083	68.6791	1.40536	0.719762	0.000102391	0.0039234
ENSG00000205667	29.505	-1.0169	0.500307	0.000102405	0.0039234
ENSG00000185028	37.8309	1.05391	0.526359	0.000110482	0.00412635
ENSG00000148346	19399	-1.16454	0.586246	0.000110839	0.00412635
ENSG00000074803	154.987	-1.21403	0.615359	0.000112197	0.00414379
ENSG00000135903	55.7507	1.58716	0.893152	0.000112568	0.00414379
ENSG00000162383	66.2264	1.41683	0.745224	0.000112384	0.00414379
ENSG00000132872	12.7515	-1.5668	0.885248	0.000117344	0.00428663
ENSG00000170819	11.192	1.0315	0.521028	0.000119113	0.00432025
ENSG00000182870	129.056	-1.22792	0.632829	0.000120661	0.00436036
ENSG00000259823	34.4463	1.19577	0.632497	0.000139226	0.00484492
ENSG00000173213	73.0946	1.02496	0.53422	0.000142879	0.00494585
ENSG00000107147	870.156	-1.11773	0.58981	0.000144551	0.00499368
ENSG00000221986	155.553	1.36574	0.757594	0.000144766	0.00499368
ENSG00000132972	3.19034	-1.38283	0.775521	0.000147399	0.00504918
ENSG00000138136	26.543	-1.72681	1.45398	0.00015237	0.00513039
ENSG00000188176	122.132	1.17632	0.648074	0.00017	0.00553512
ENSG00000176988	4.55949	-1.13711	0.623094	0.000171189	0.00556464
ENSG00000133636	1341.2	-1.4809	0.918952	0.00017151	0.00556591
ENSG00000106631	30.9716	1.31276	0.755295	0.000175466	0.00564012
ENSG00000161973	39.1242	1.14098	0.631101	0.00017816	0.00569737
ENSG00000165066	76.5072	1.41353	0.869998	0.000187278	0.00588404
ENSG00000143768	134.952	1.08856	0.608965	0.000195994	0.0061058
ENSG00000168267	5.80674	1.58437	1.21802	0.00019708	0.00612377
ENSG00000152785	126.113	1.08176	0.606326	0.000198905	0.0061514
ENSG00000179673	24.6575	-1.35813	0.831967	0.000201283	0.00618615
ENSG00000181790	771.158	-1.18221	0.681473	0.000204572	0.00624832
ENSG00000102466	116.333	-1.04184	0.585312	0.000208182	0.00633894
ENSG00000142549	356.296	1.0858	0.616198	0.000209896	0.00636169
ENSG00000146857	21.6932	-1.07746	0.614705	0.000216642	0.00651611
ENSG00000221946	129.776	1.02922	0.58463	0.000222021	0.00662212
ENSG00000130035	325.731	1.12806	0.657212	0.000225903	0.00669518
ENSG00000196196	446.393	-1.02222	0.584927	0.00023144	0.00679545
ENSG00000137142	51.9826	1.03033	0.592341	0.000234727	0.00684106
ENSG00000163737	5.81455	-1.00572	0.577423	0.000239076	0.00692688
ENSG00000135374	193.197	-1.20146	0.733214	0.000247548	0.00707295
ENSG00000186086	13.8353	1.44504	1.05354	0.000247702	0.00707295
ENSG00000185988	5.54735	-1.06484	0.62627	0.000251069	0.00714839
ENSG00000284234	8.34041	-1.21151	1.7553	0.00025169	0.00715577
ENSG00000124875	125.198	-1.09284	0.649317	0.000254369	0.00720081
ENSG00000187733	10781.7	-1.24945	0.798514	0.00026794	0.0074566
ENSG00000166159	83.5549	1.31068	0.871889	0.000269563	0.00747016
ENSG00000189377	5638.59	-1.24354	0.798513	0.000274107	0.00754312
ENSG00000164532	28.5826	1.19605	0.754009	0.00027795	0.00761481
ENSG00000147160	3.12973	-1.20475	0.766067	0.000282095	0.00768058
ENSG00000171711	32.2203	-1.31245	0.891934	0.000282217	0.00768058
ENSG00000255298	12.2732	1.39808	1.40801	0.000300279	0.00810507
ENSG00000283992	858.513	-1.31072	0.925566	0.000306387	0.00820262
ENSG00000171402	8.1142	1.40318	1.32086	0.00030862	0.00824002
ENSG00000223638	17.1702	1.34857	1.01542	0.000315104	0.0083566
ENSG00000179796	206.31	-1.06586	0.667151	0.000323027	0.0084756
ENSG00000197123	73.0405	1.3625	1.08325	0.000324863	0.00849109
ENSG00000255071	32.4077	-1.17763	0.792895	0.000347984	0.00888237
ENSG00000268434	5.03443	1.00072	0.636084	0.000374102	0.0093304
ENSG00000171201	35.6477	-1.26636	1.42416	0.000379221	0.00934571
ENSG00000181195	35.2317	1.10293	0.734556	0.000379872	0.00934571
ENSG00000179008	14.9329	1.24311	0.919744	0.000381168	0.0093659
ENSG00000136110	3.28075	1.17371	0.830539	0.000397776	0.00965225
ENSG00000099617	73.4175	1.11447	0.764152	0.000406686	0.00975553
ENSG00000256980	20.4125	-1.13313	0.785731	0.000406362	0.00975553
ENSG00000163825	9.55203	1.22895	0.950968	0.000421791	0.0100537
ENSG00000166091	5.4612	1.06779	0.723655	0.000424125	0.0100703
ENSG00000257743	78.119	-1.0074	0.665204	0.000427282	0.0101088
ENSG00000177023	8.72232	-1.12049	1.46957	0.000447796	0.0104438
ENSG00000242019	2.15876	-1.1366	1.41422	0.00047589	0.0108437
ENSG00000128250	8.94908	1.08692	0.790745	0.000499657	0.0112158
ENSG00000229183	174.786	-1.00193	0.690785	0.000499214	0.0112158
ENSG00000075388	22.4862	1.1978	1.11663	0.000523078	0.0116226
ENSG00000251493	139.732	1.05273	0.770815	0.000541772	0.011899
ENSG00000229453	6.50424	-1.14455	1.08421	0.000604524	0.0127434
ENSG00000163586	104.127	1.11398	0.934689	0.000608531	0.0127821
ENSG00000088926	4.53167	-1.06928	0.897304	0.000677935	0.0136537
ENSG00000229292	7.40412	1.05467	1.19858	0.000718665	0.0142084
ENSG00000043355	373.385	1.03519	0.856411	0.000720877	0.0142379
ENSG00000164871	126.078	-1.04119	0.948583	0.000790147	0.0149328
ENSG00000164122	15.1706	-1.01463	0.94265	0.000860729	0.0157518
